# Supplementary material for: 2-Second In-Situ Formation of Adaptive Electronic Bio-Skin Enabled by Metal Coordination
Source: Research Square preprint supplement (doi:10.21203/rs.3.rs-6344254/v1), 2025-04-15
Supplement: Supplementary file 1 [file df9dd375c1af2dae416e77dc.docx]

**Supplementary Information**

**2-Second In-Situ Formation of Adaptive Electronic Bio-Skin Enabled by Metal Coordination**

This supplementary information file includes:

- Supplementary Figures 1-23
- Supplementary Tables 1-2
- Supplementary Videos 1-3
- Supplementary References 1


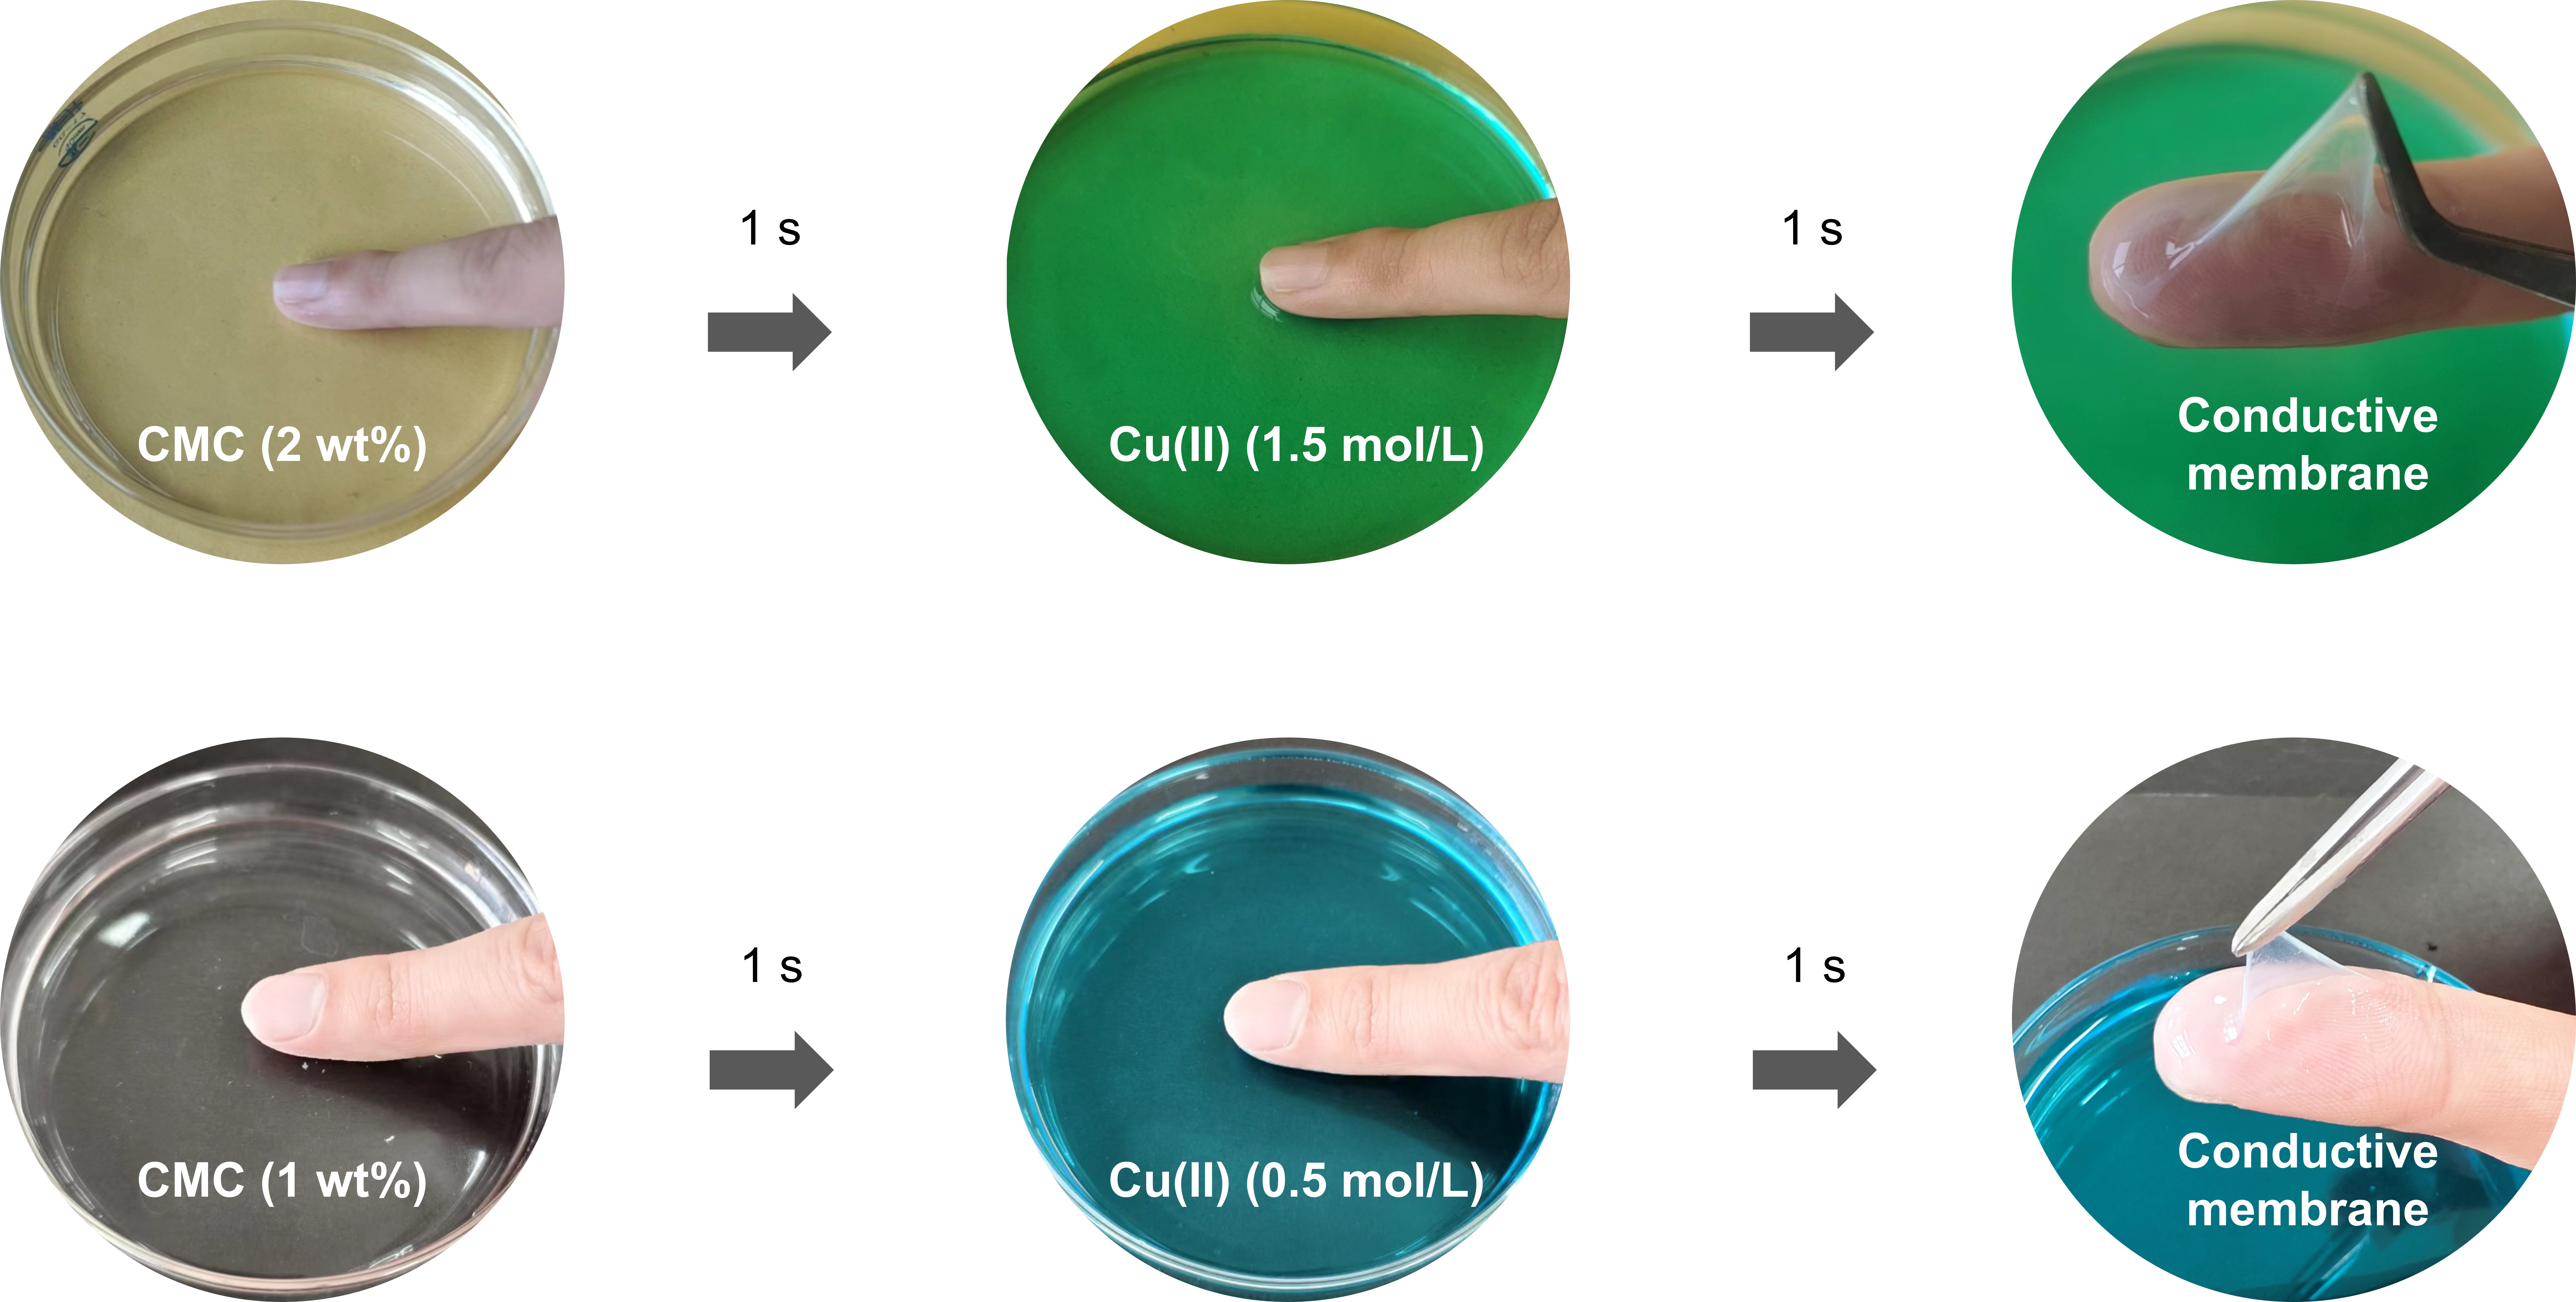


Supplementary Fig. 1. Digital photographs of CMC-Cu(II) membranes fabricated by the “dipping-dipping” coordination assembly process from CMC and Cu(II) solutions with different concentrations.


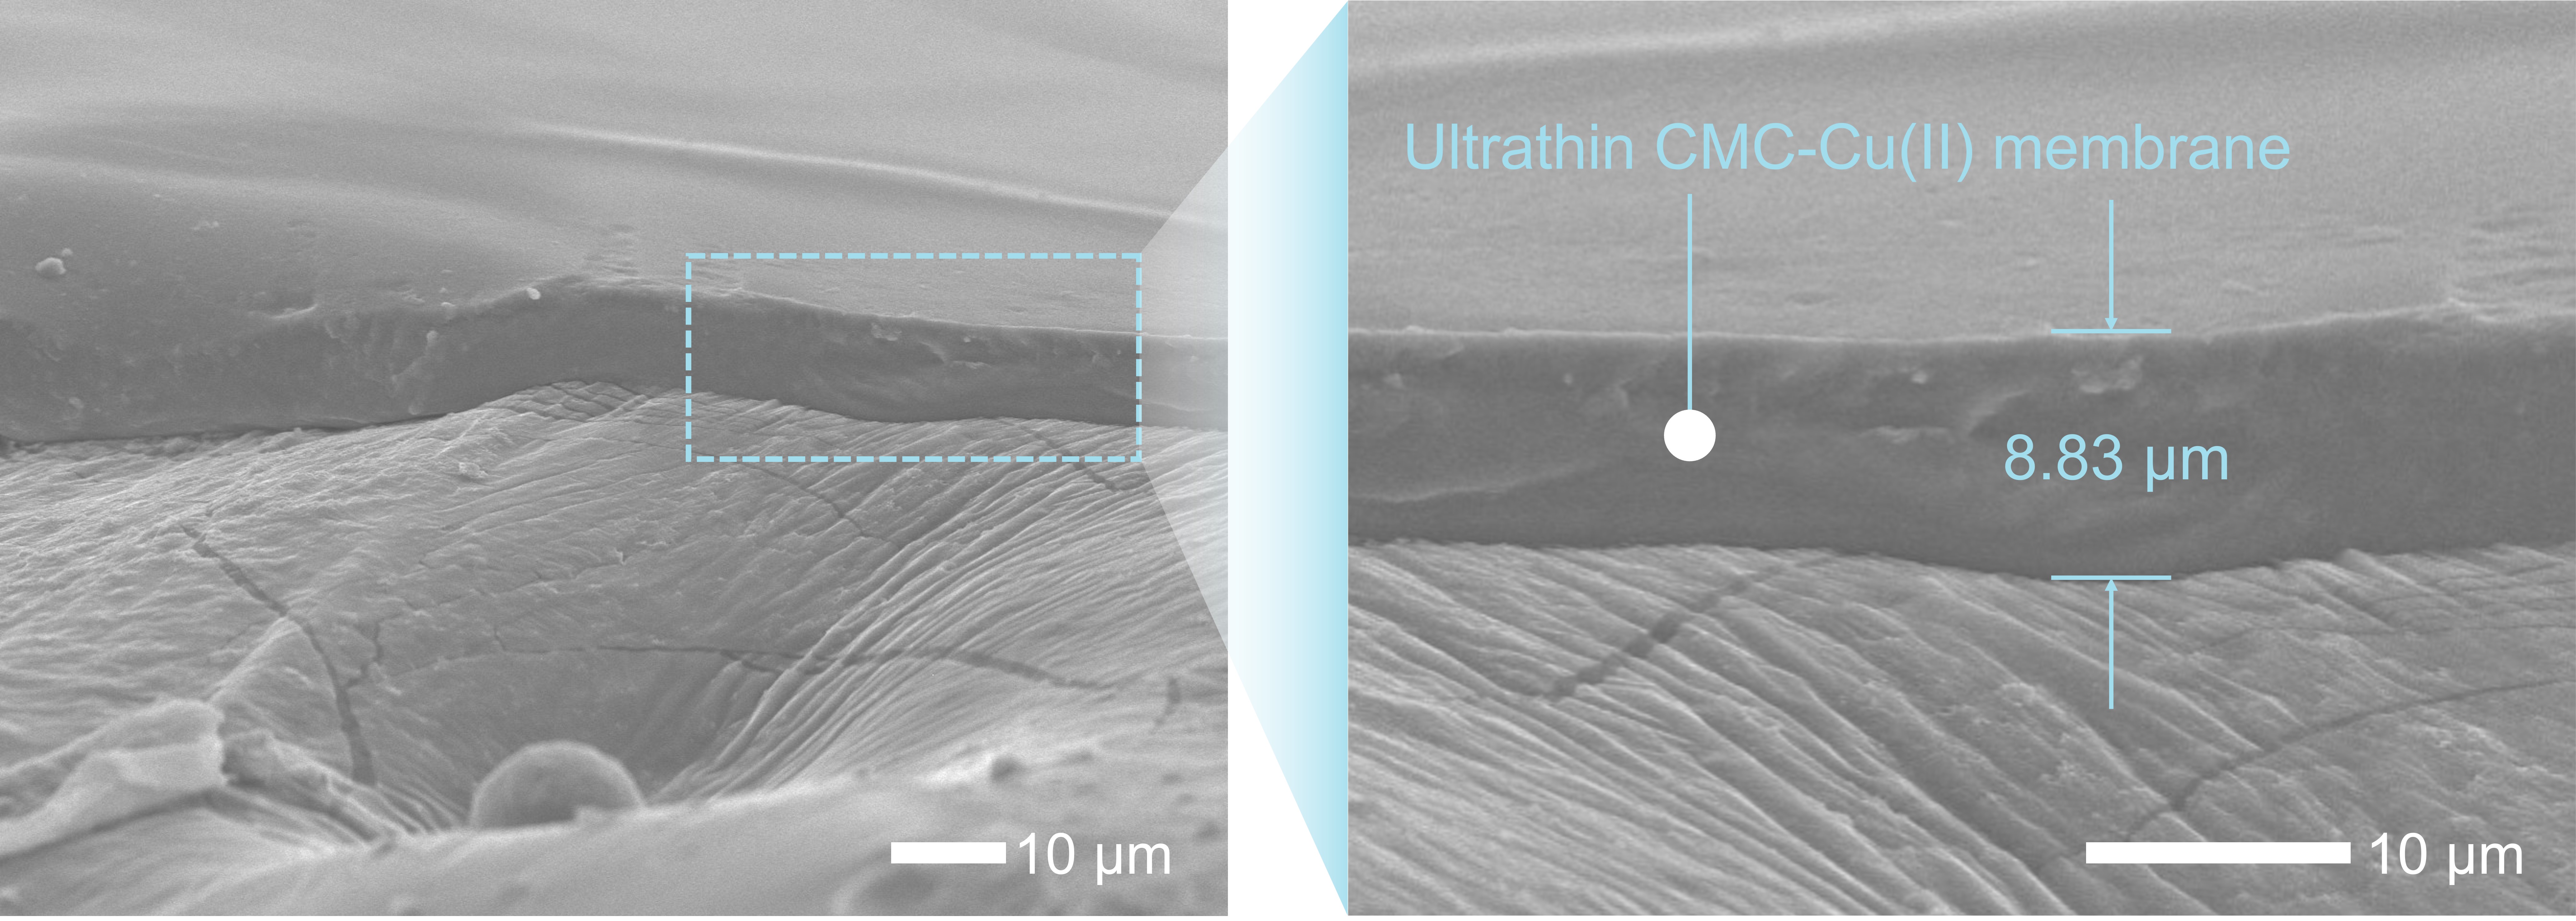


**Supplementary Fig. 2.** Cross-sectional SEM image of ultra-thin CMC-Cu(II) membrane. Scale bar, 10 μm.


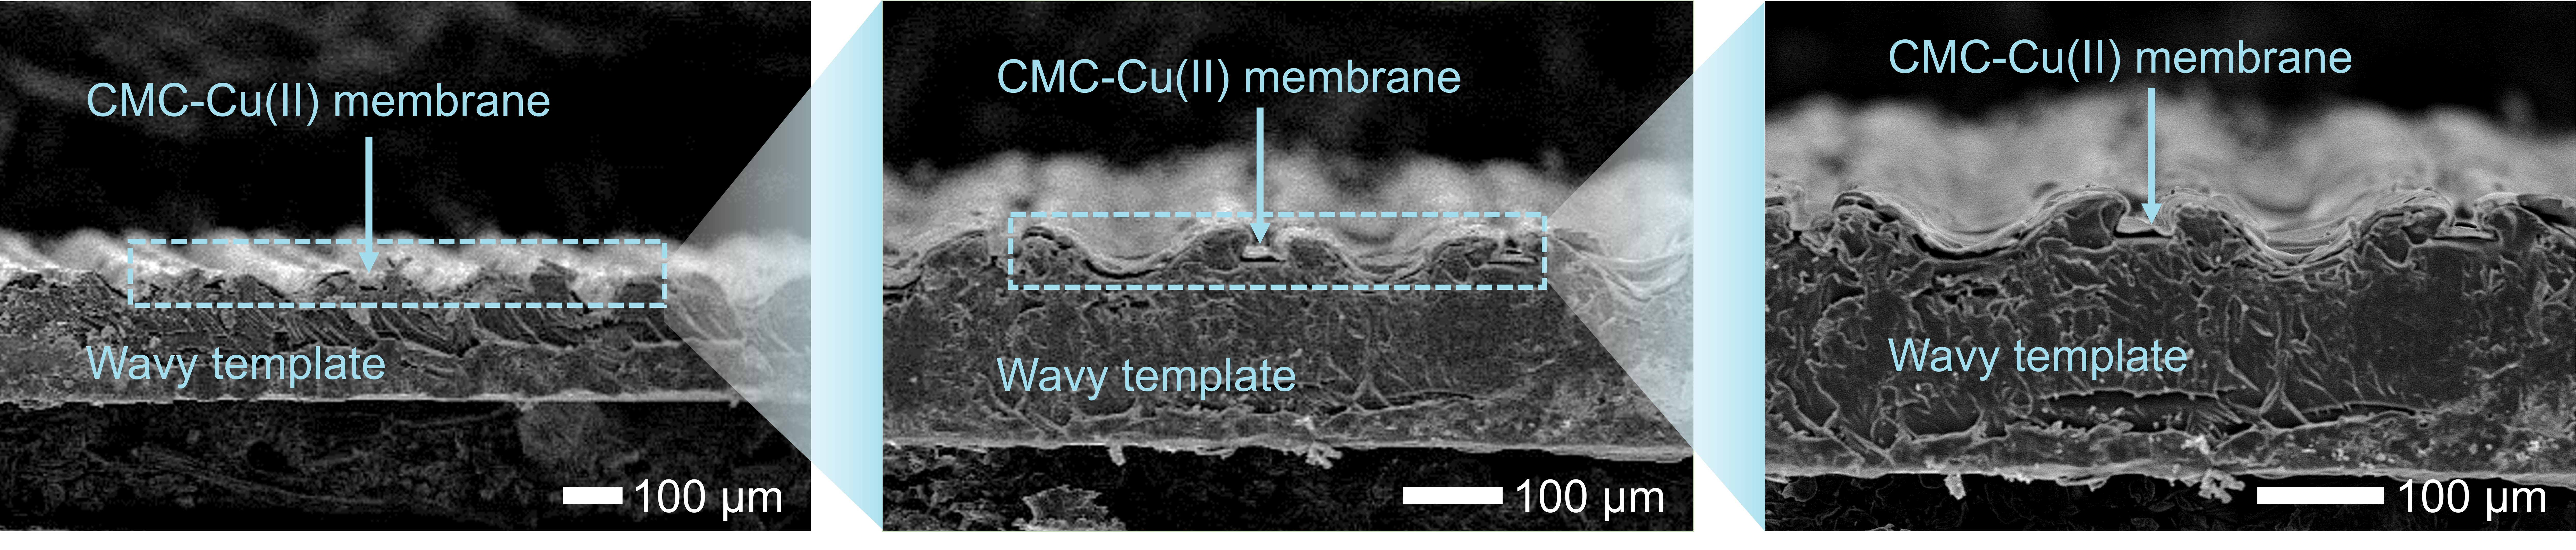


Supplementary Fig. 3. Cross-sectional SEM images of highly conformal CMC-Cu(II) membrane attached on PVC wavy mold. Scale bar, 100 μm.


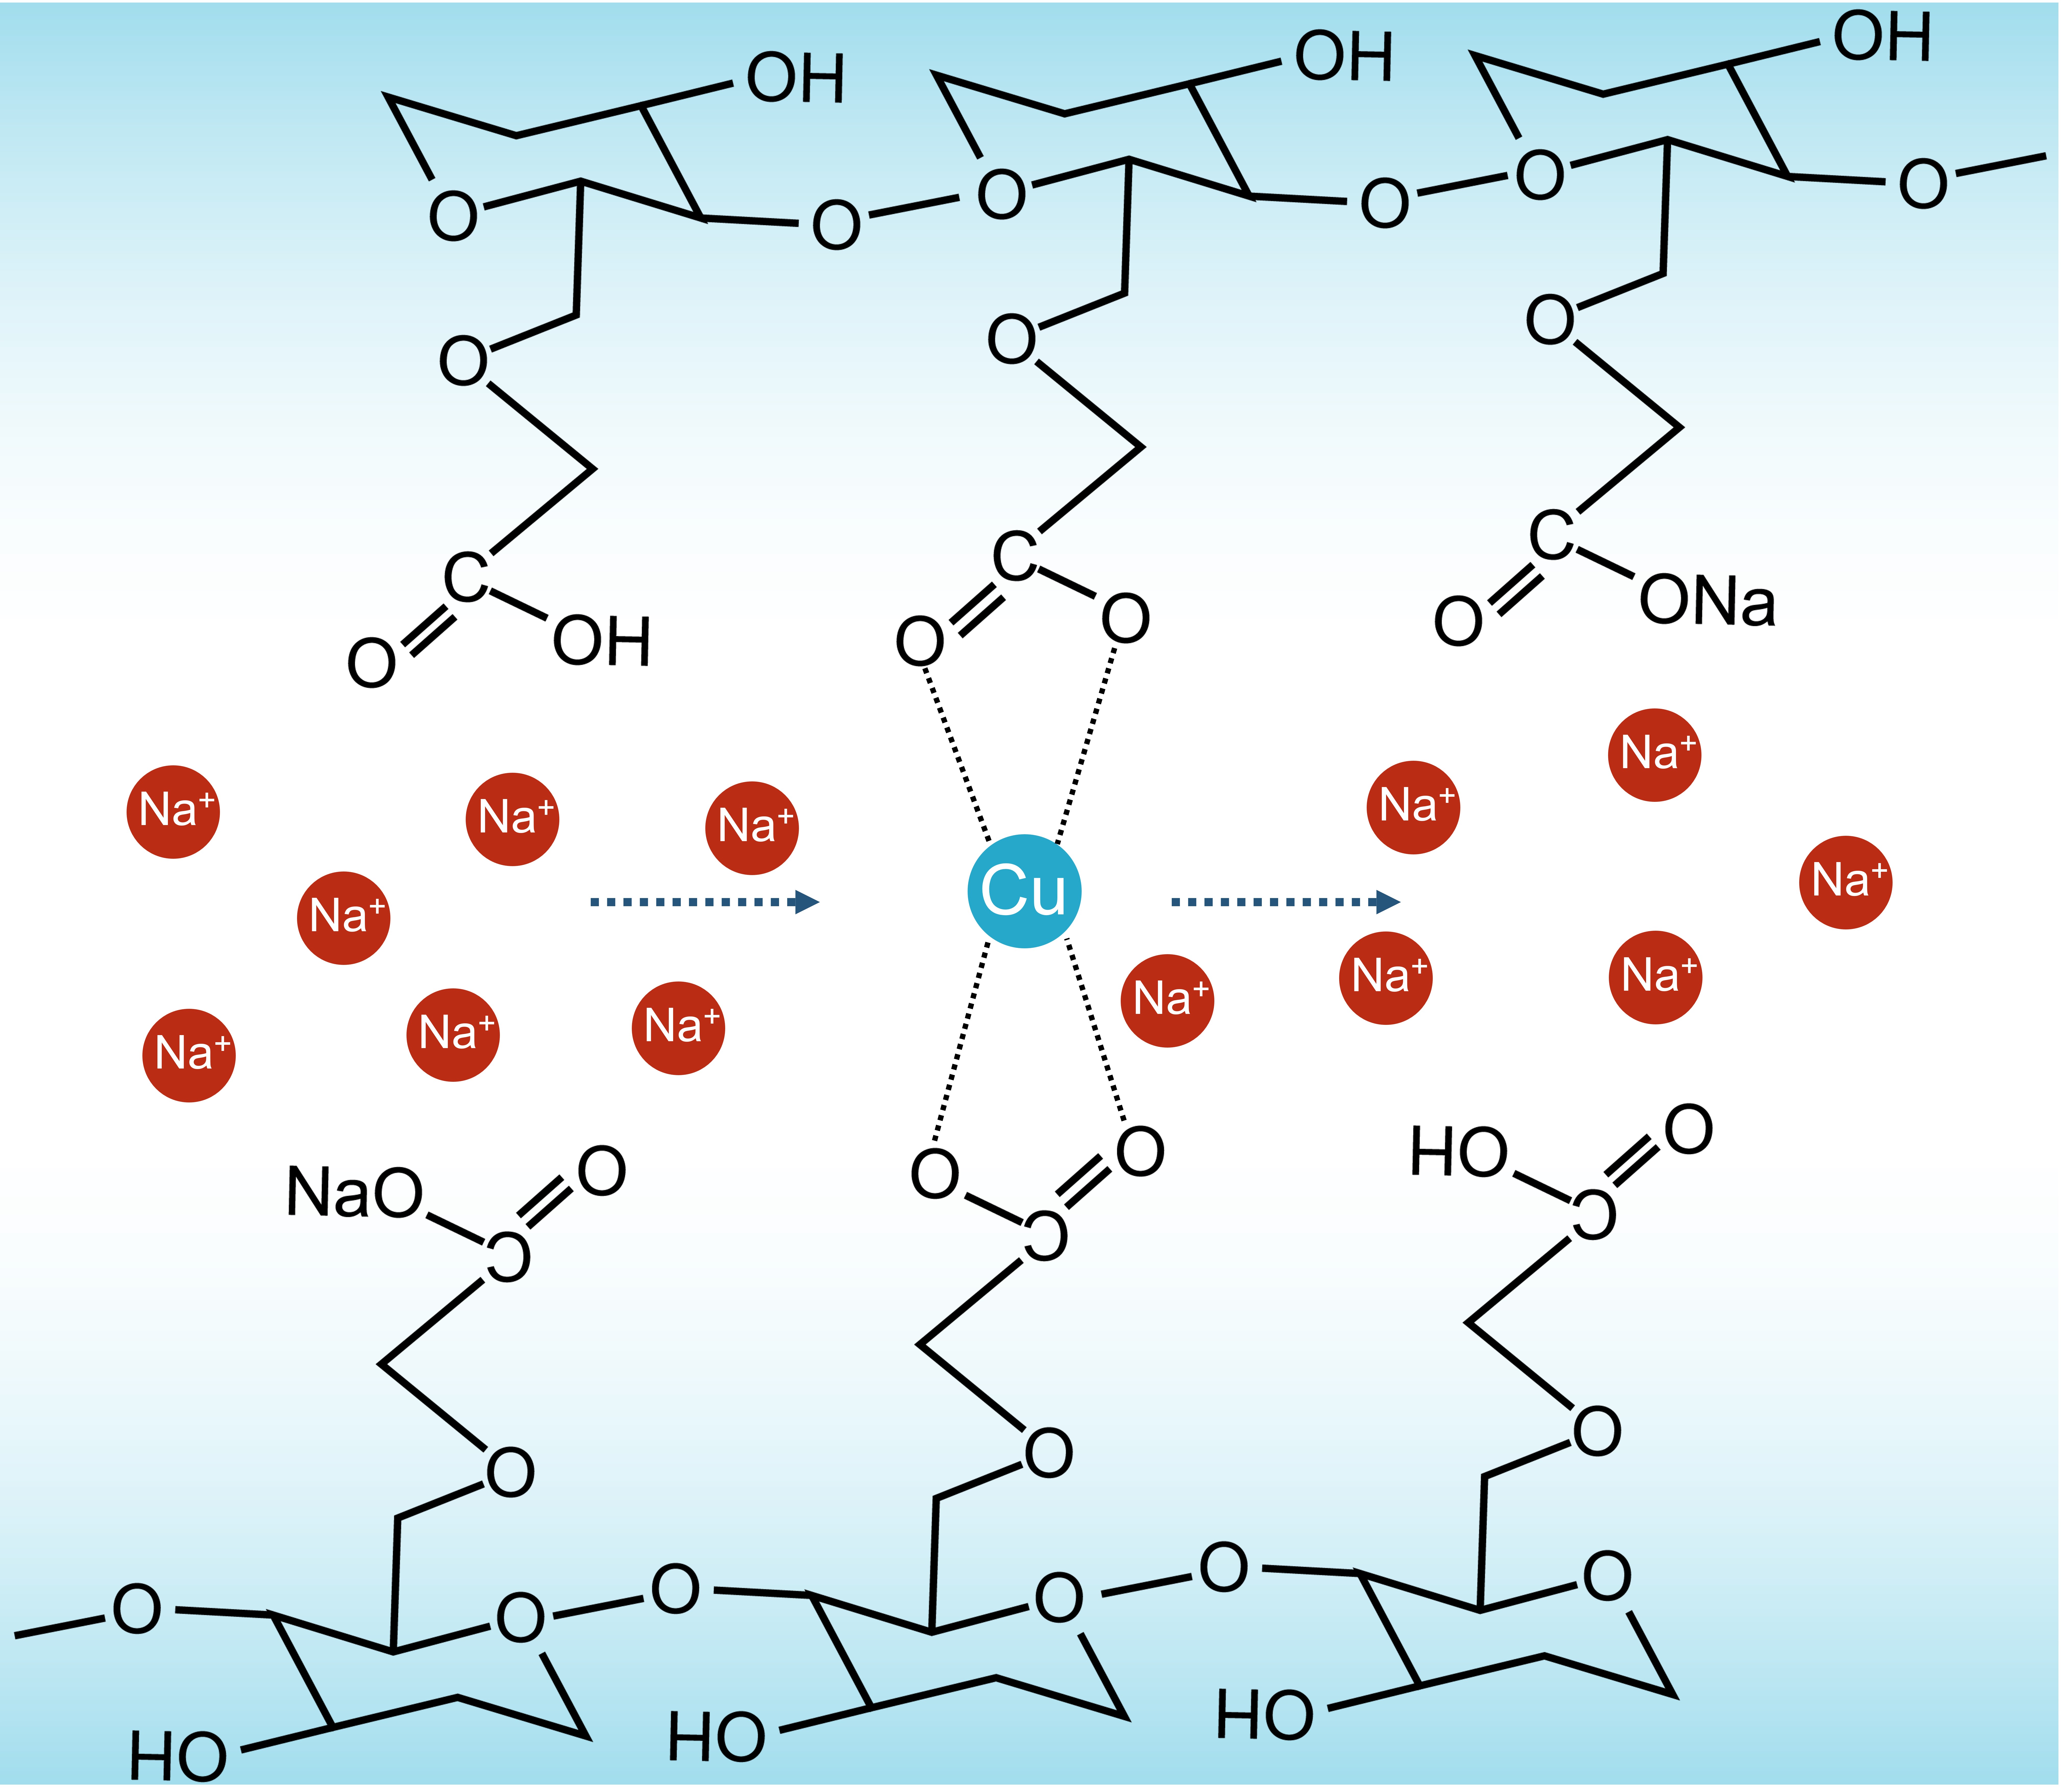


Supplementary Fig. 4. Schematic illustration of the assembly of CMC molecules into support channels induced by Cu(II) coordination bonds in CMC-Cu(II) membrane to facilitate ion transport and consequently enhance electrical conductivity1.


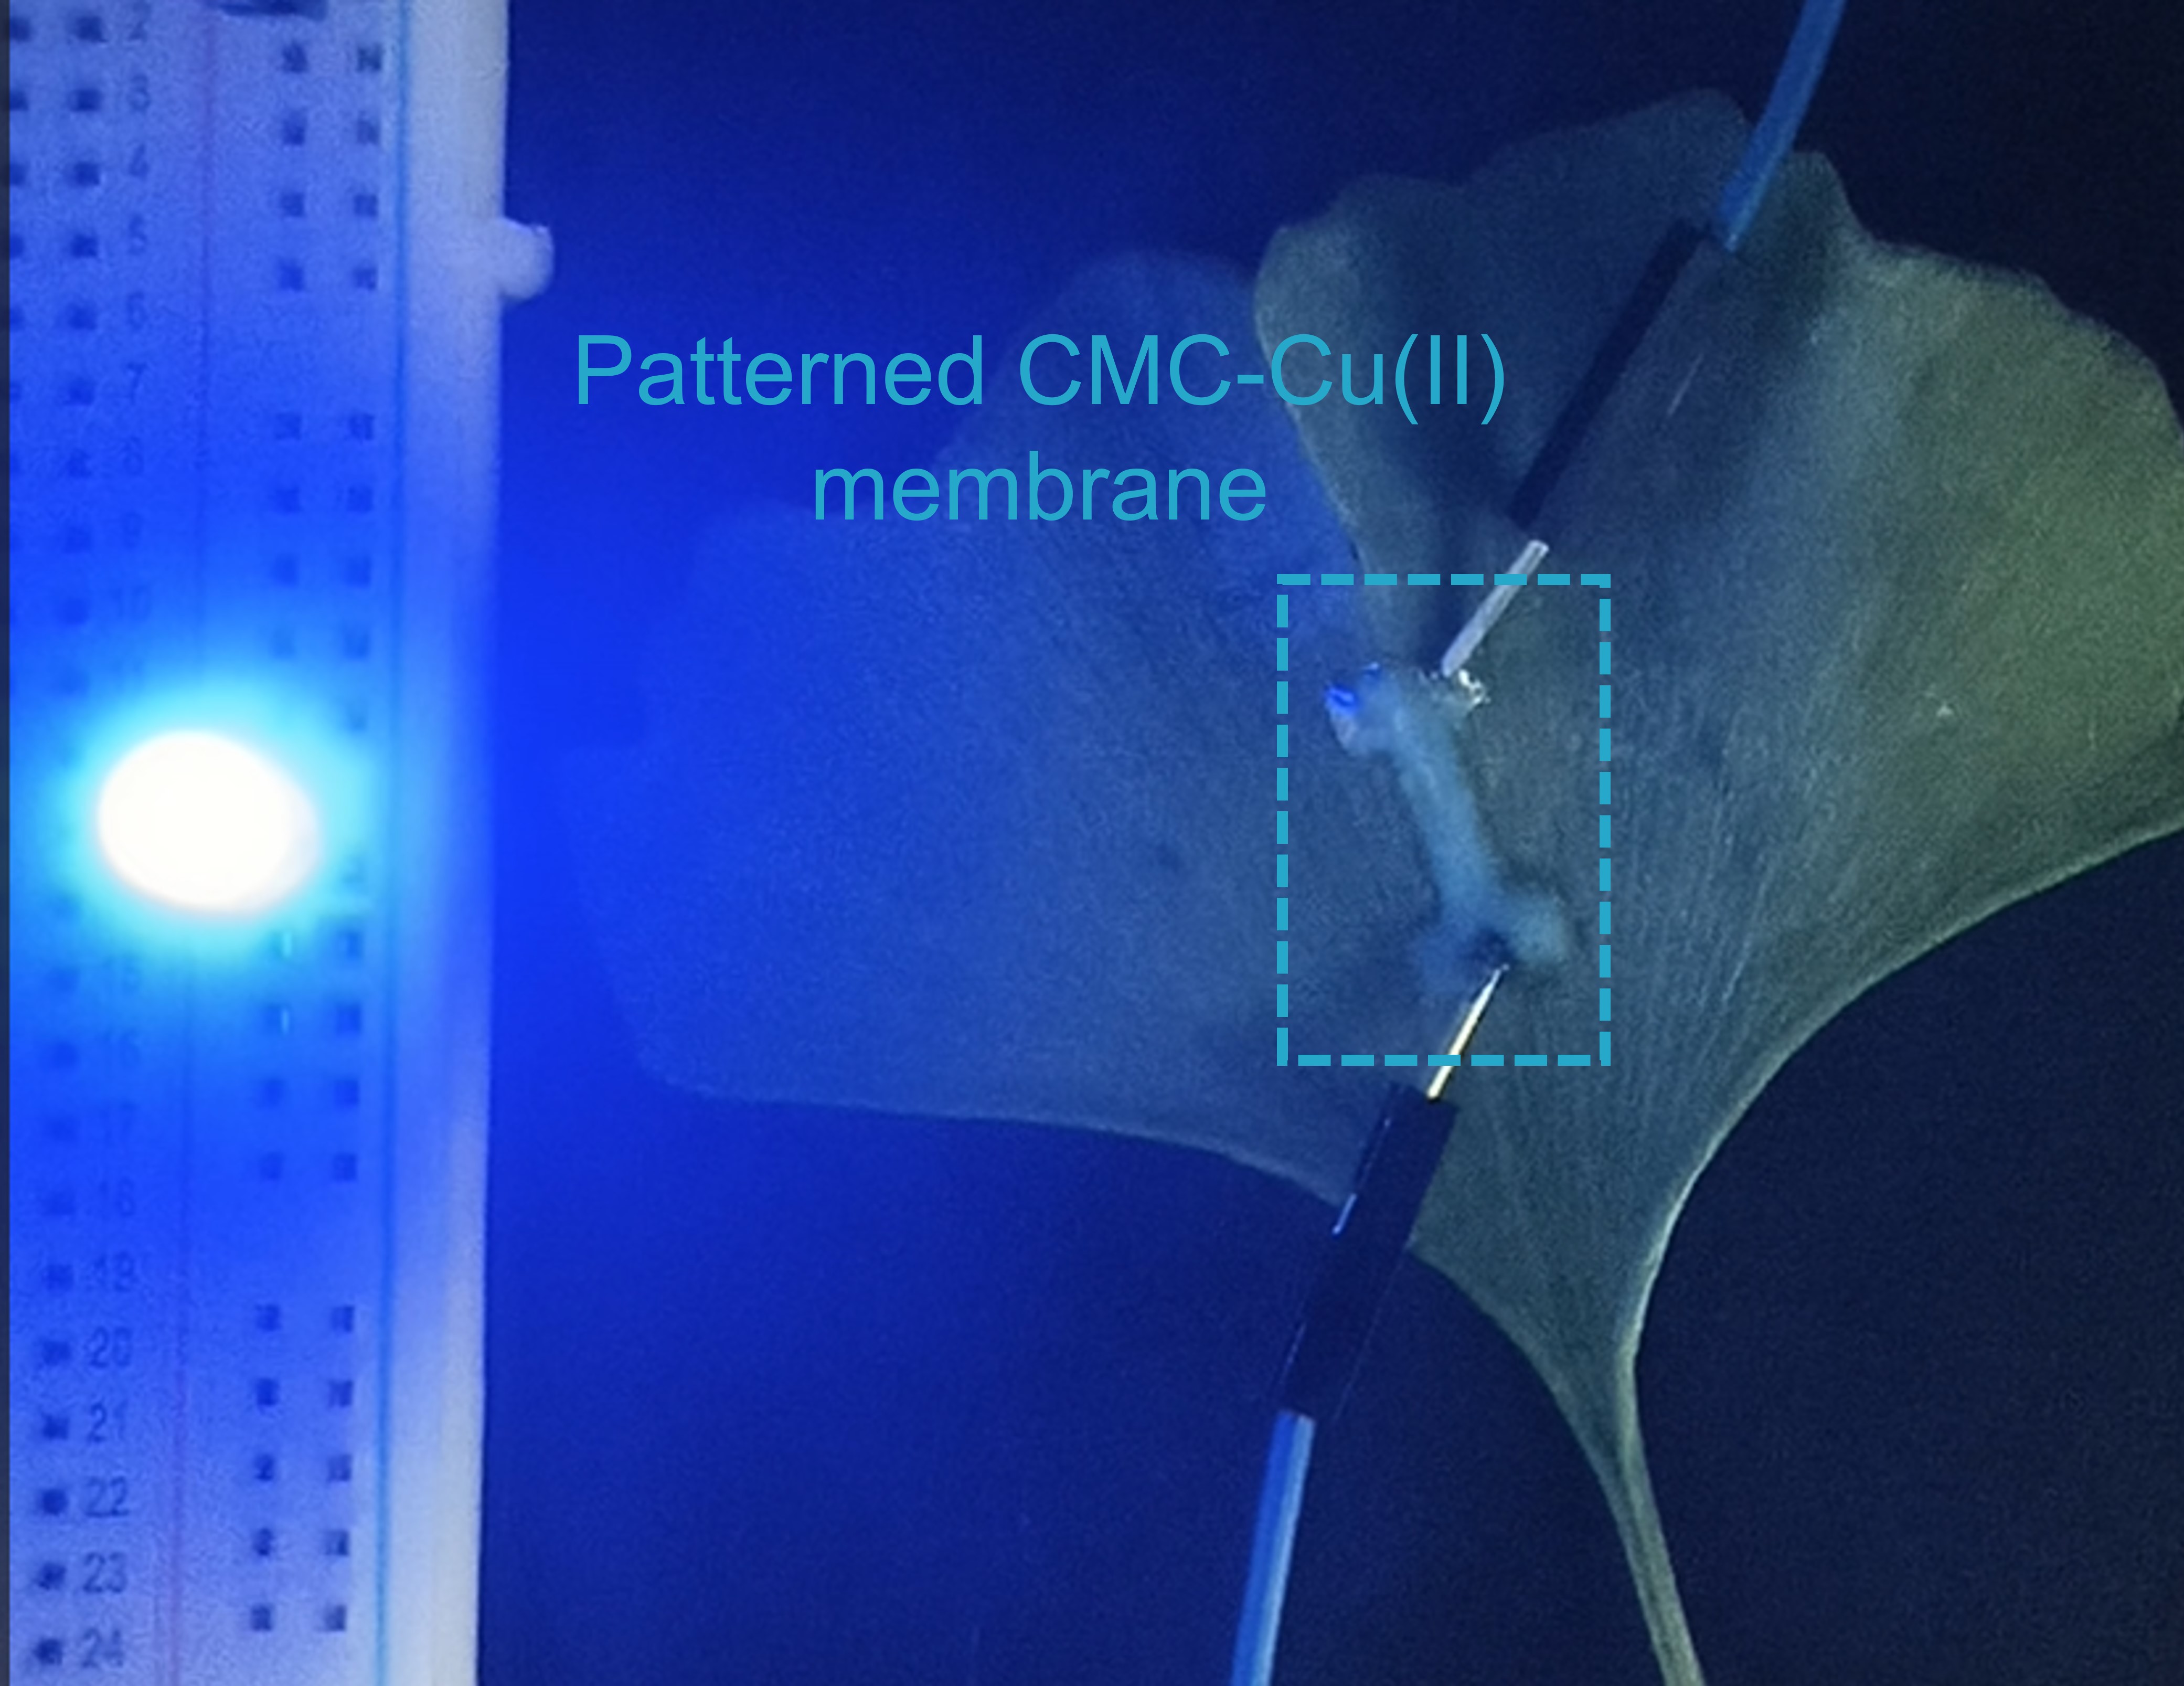


Supplementary Fig. 5. Schematic illustration of illuminating LED light using a dumbbell-shaped CMC-Cu(II) membrane as a conductive path, which is in situ prepared on leaf substrate.


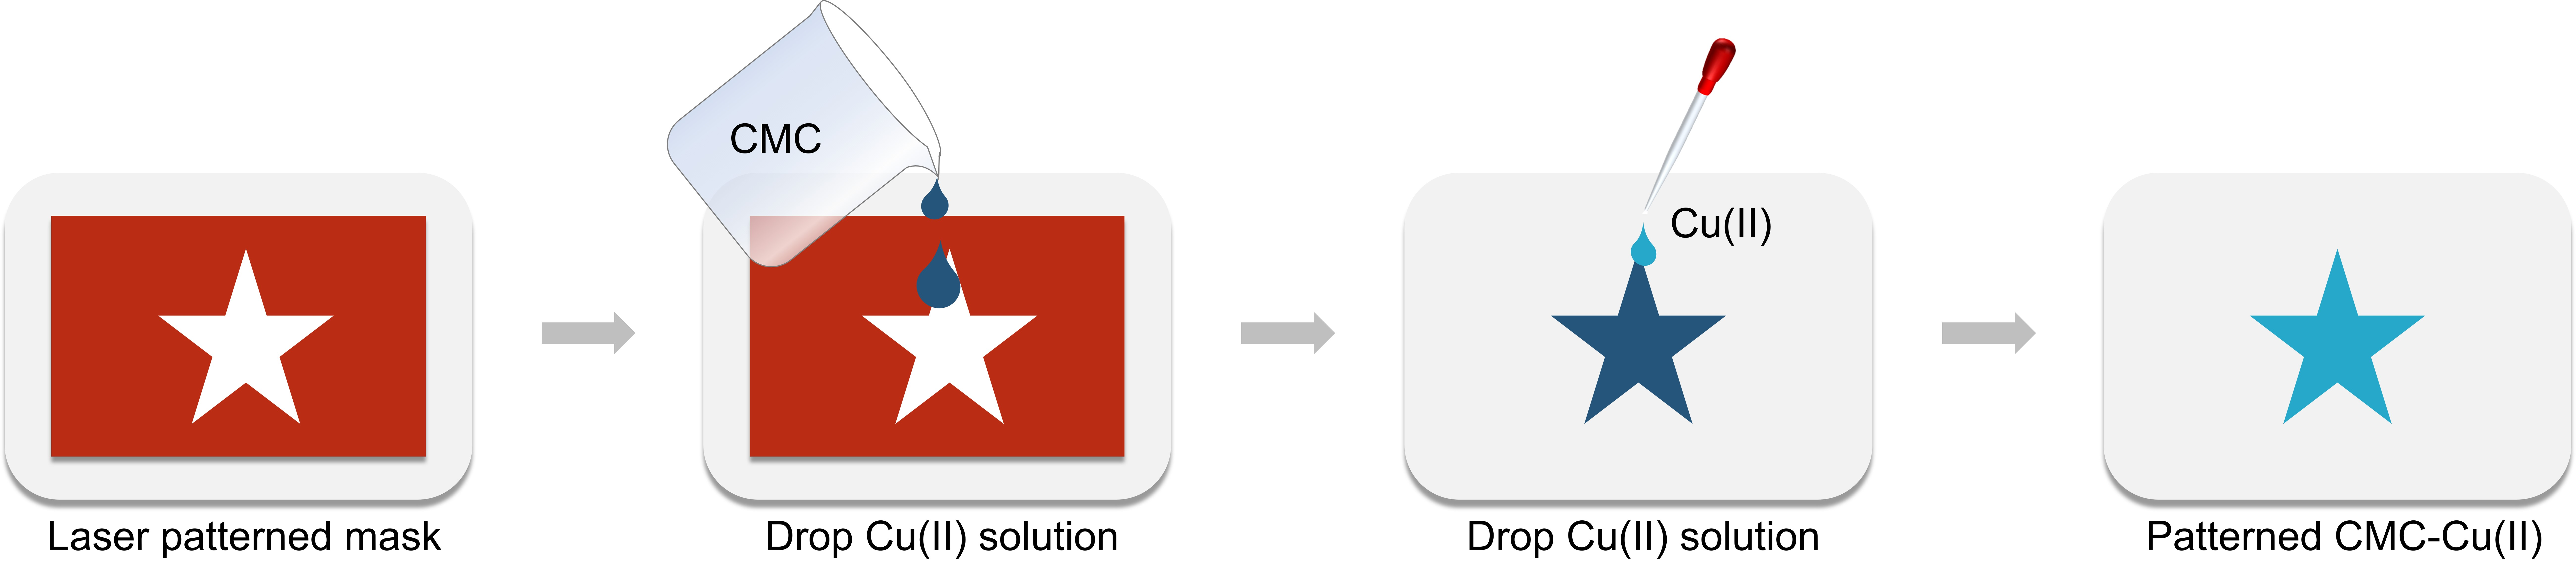


Supplementary Fig. 6. Schematic representation of the fabrication process for patterned CMC-Cu(II) via mask-forming approach.


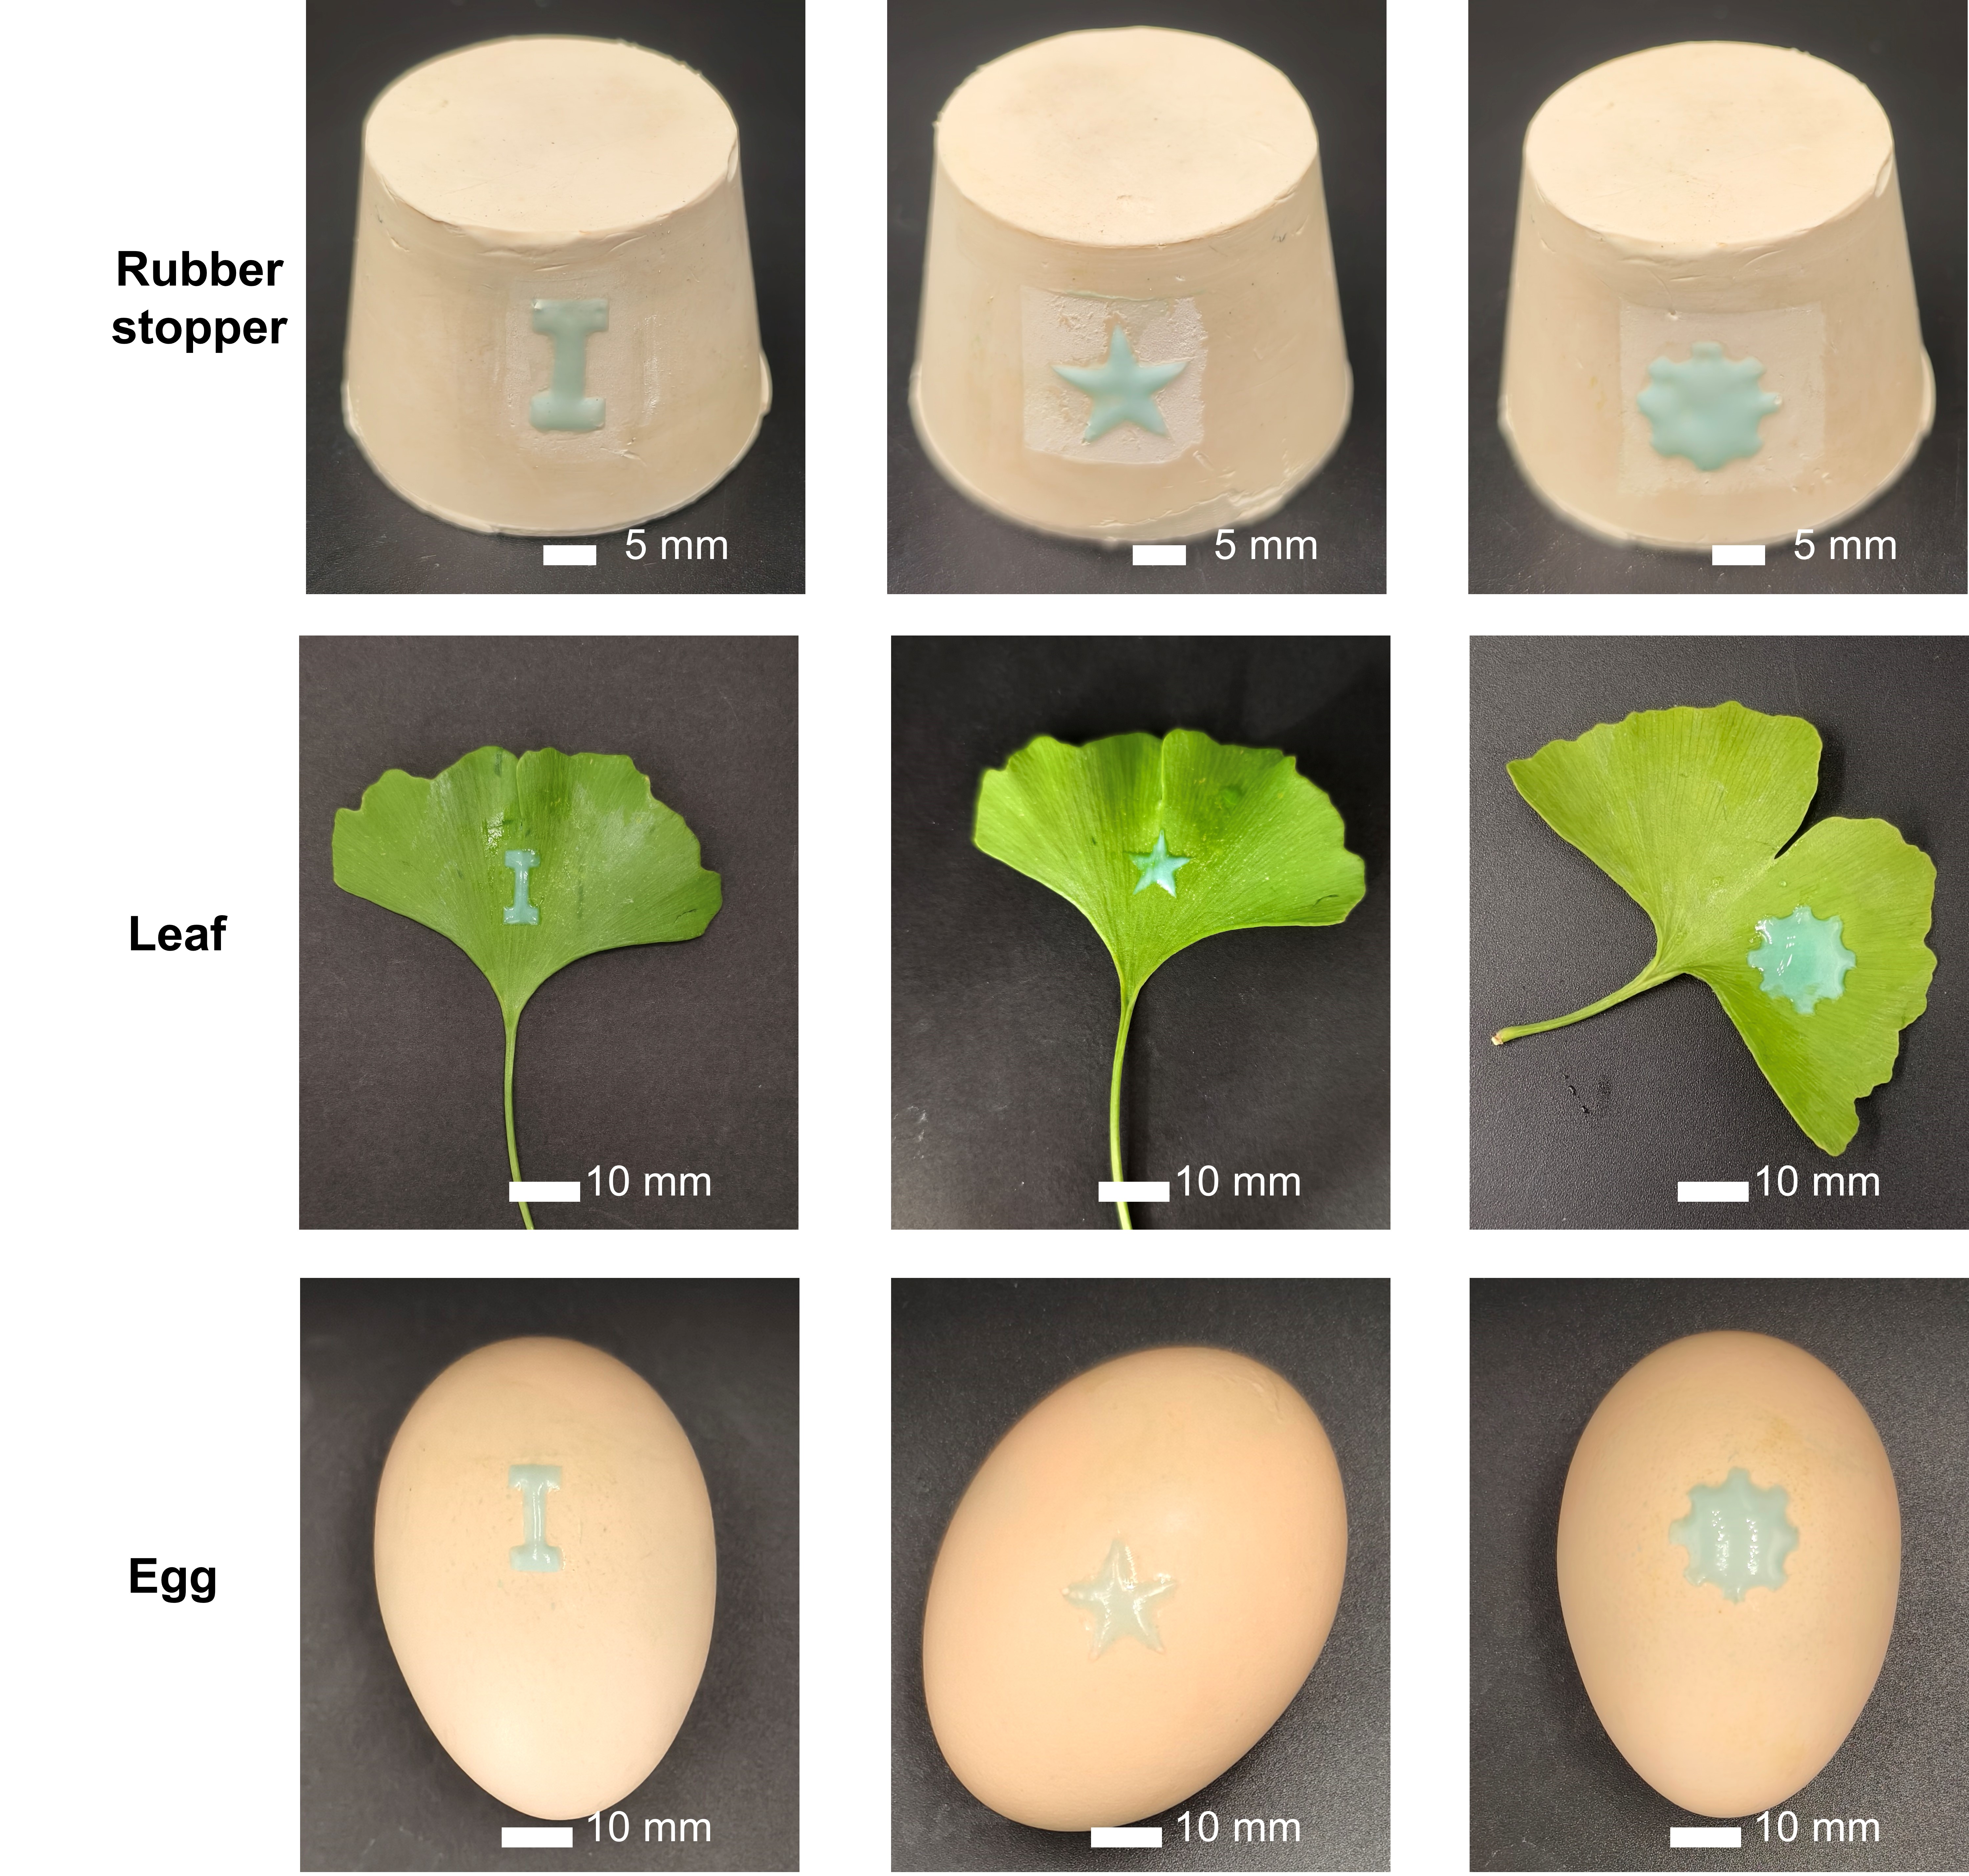


Supplementary Fig. 7. Patterning CMC-Cu(II) on 2D and 3D substrates of different materials including rubber stopper substrate, leaf substrate, and egg substrate using mask-forming method.


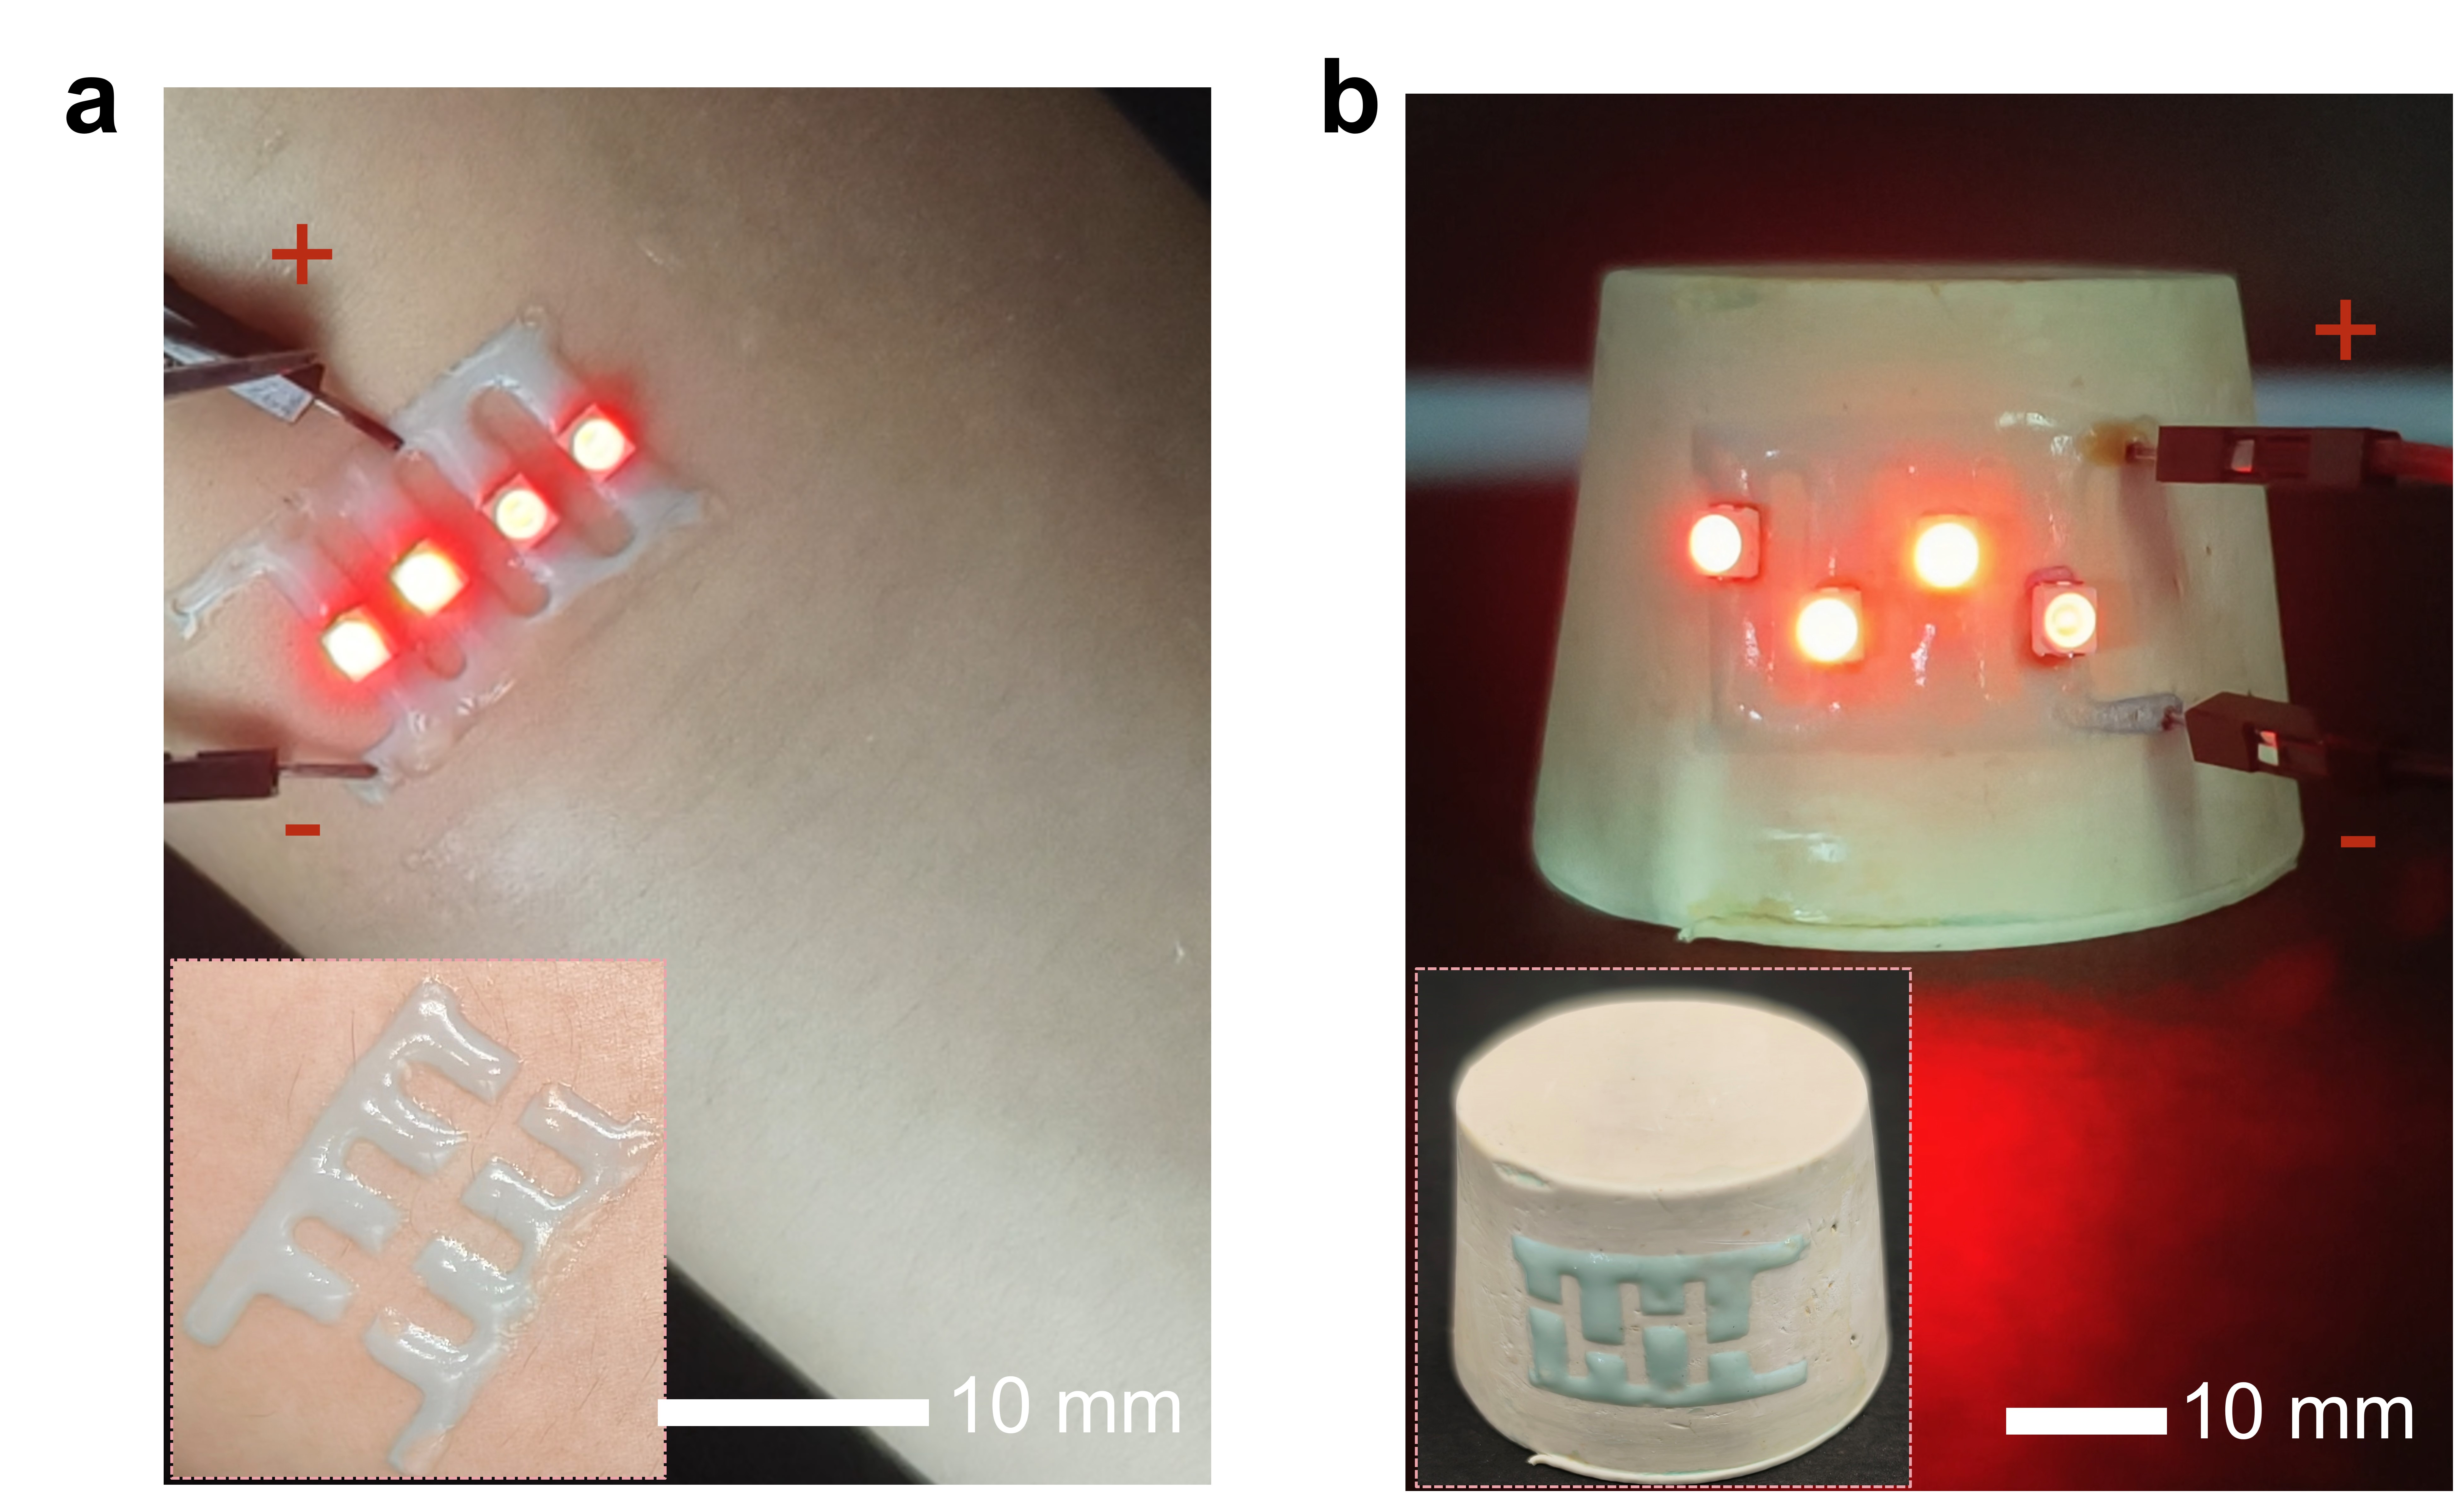


Supplementary Fig. 8. The CMC-Cu(II) microelectronic circuits formed on human skin (a) and rubber stopper interface (b).

**
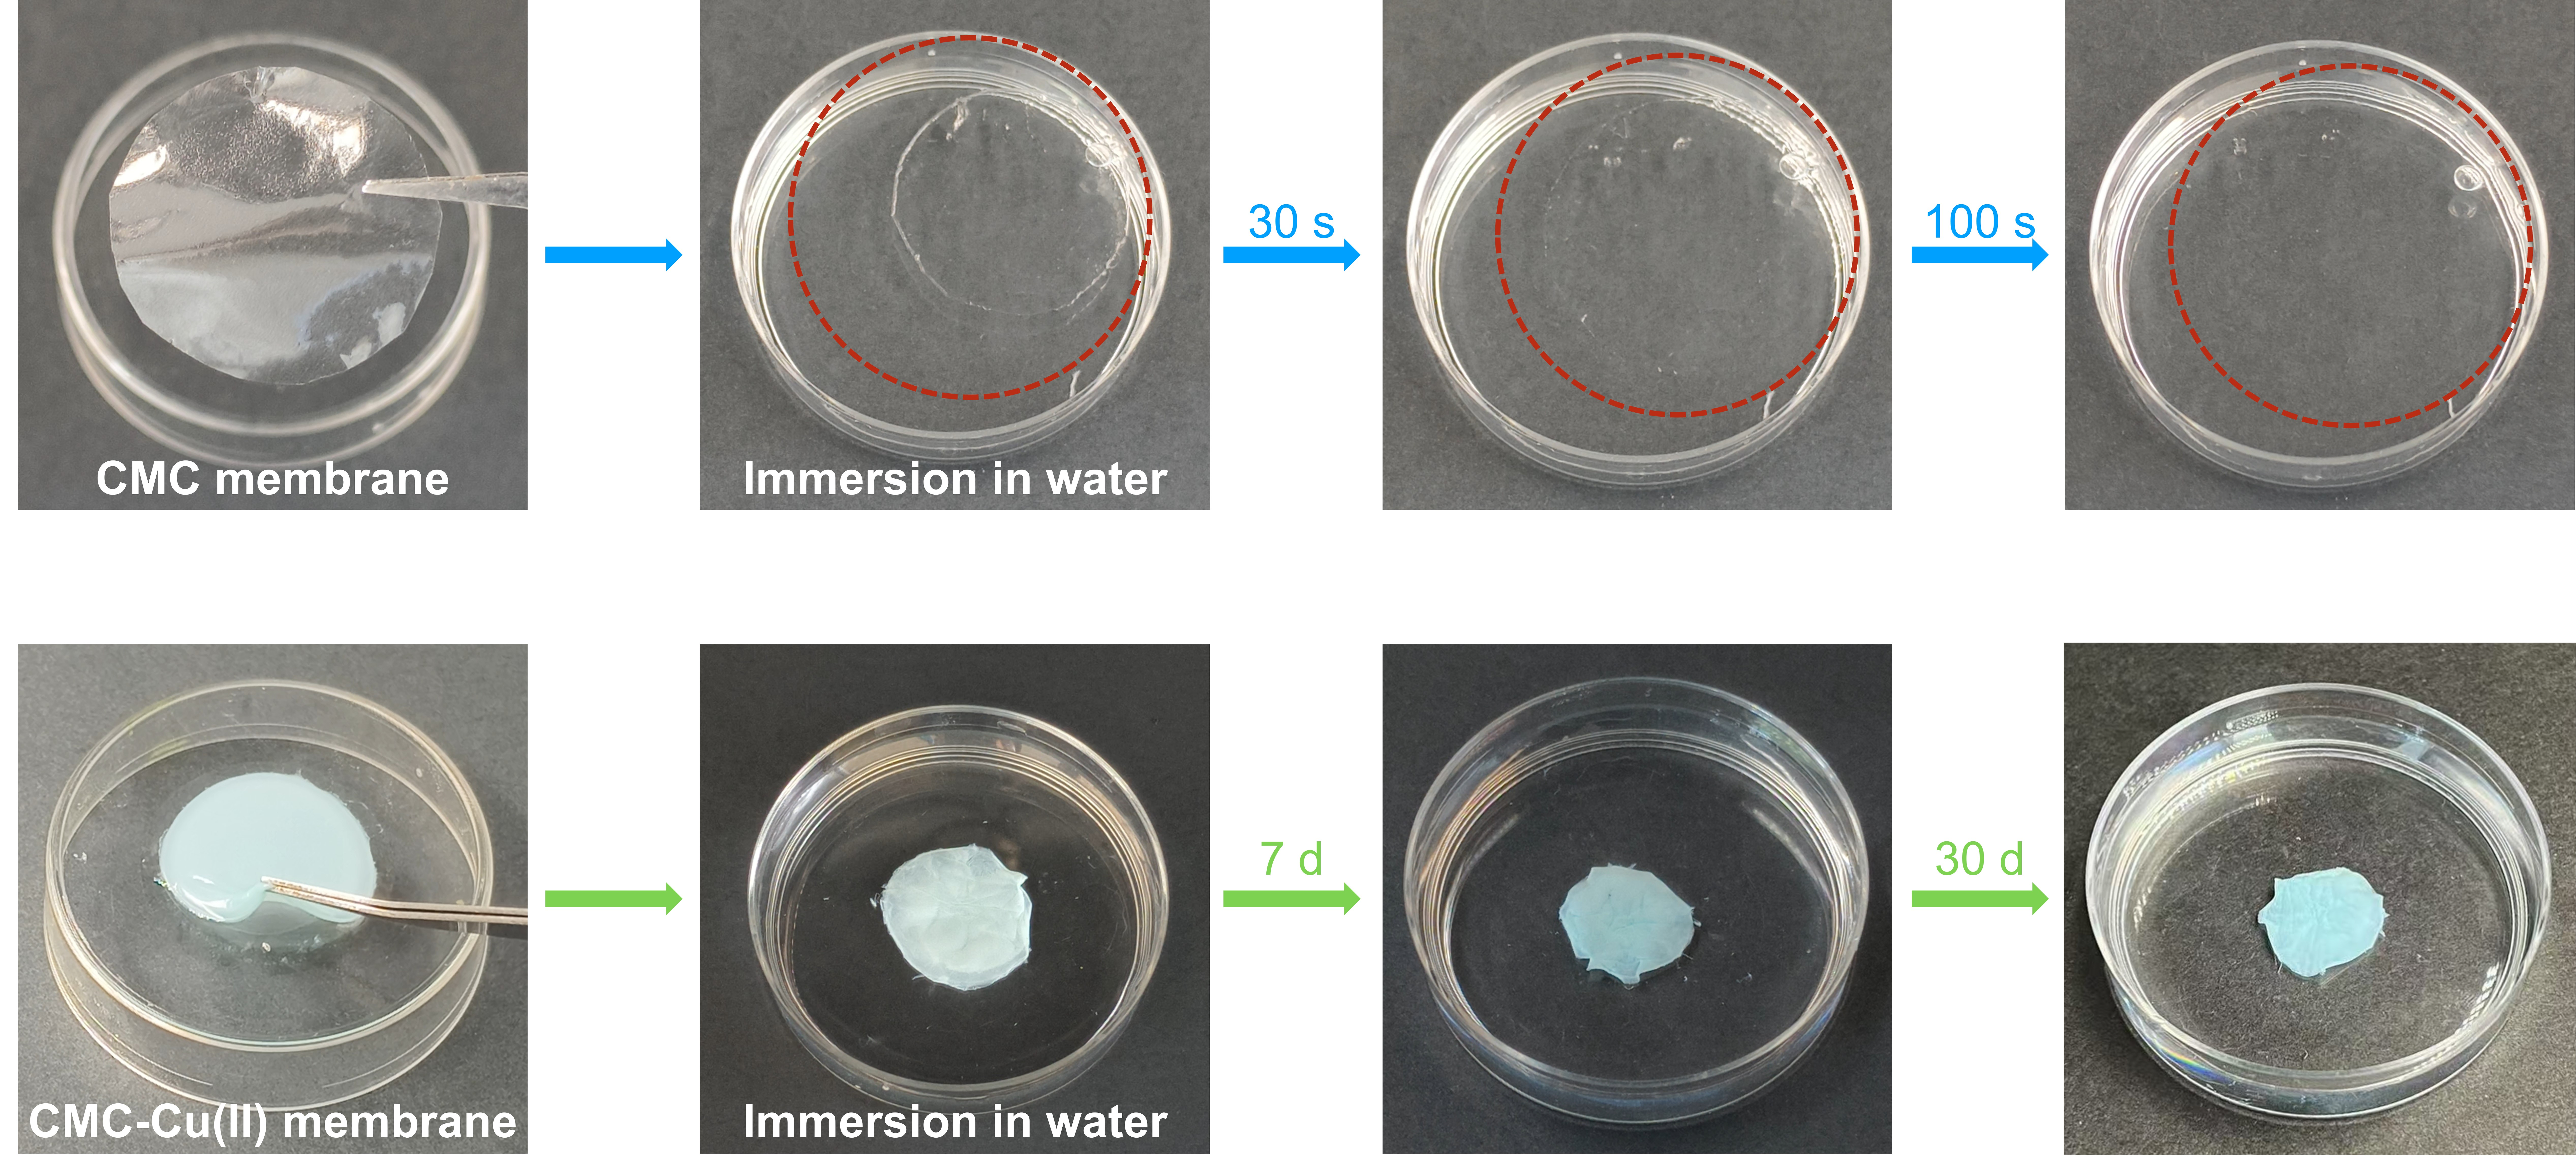
**

Supplementary Fig. 9. The solubility and stability of the CMC and CMC-Cu(II) membranes in water. The neat CMC membrane dissolves and disappears in water within 100 s; while the CMC-Cu(II) membrane retains its structure for up to 30 days in water.

**
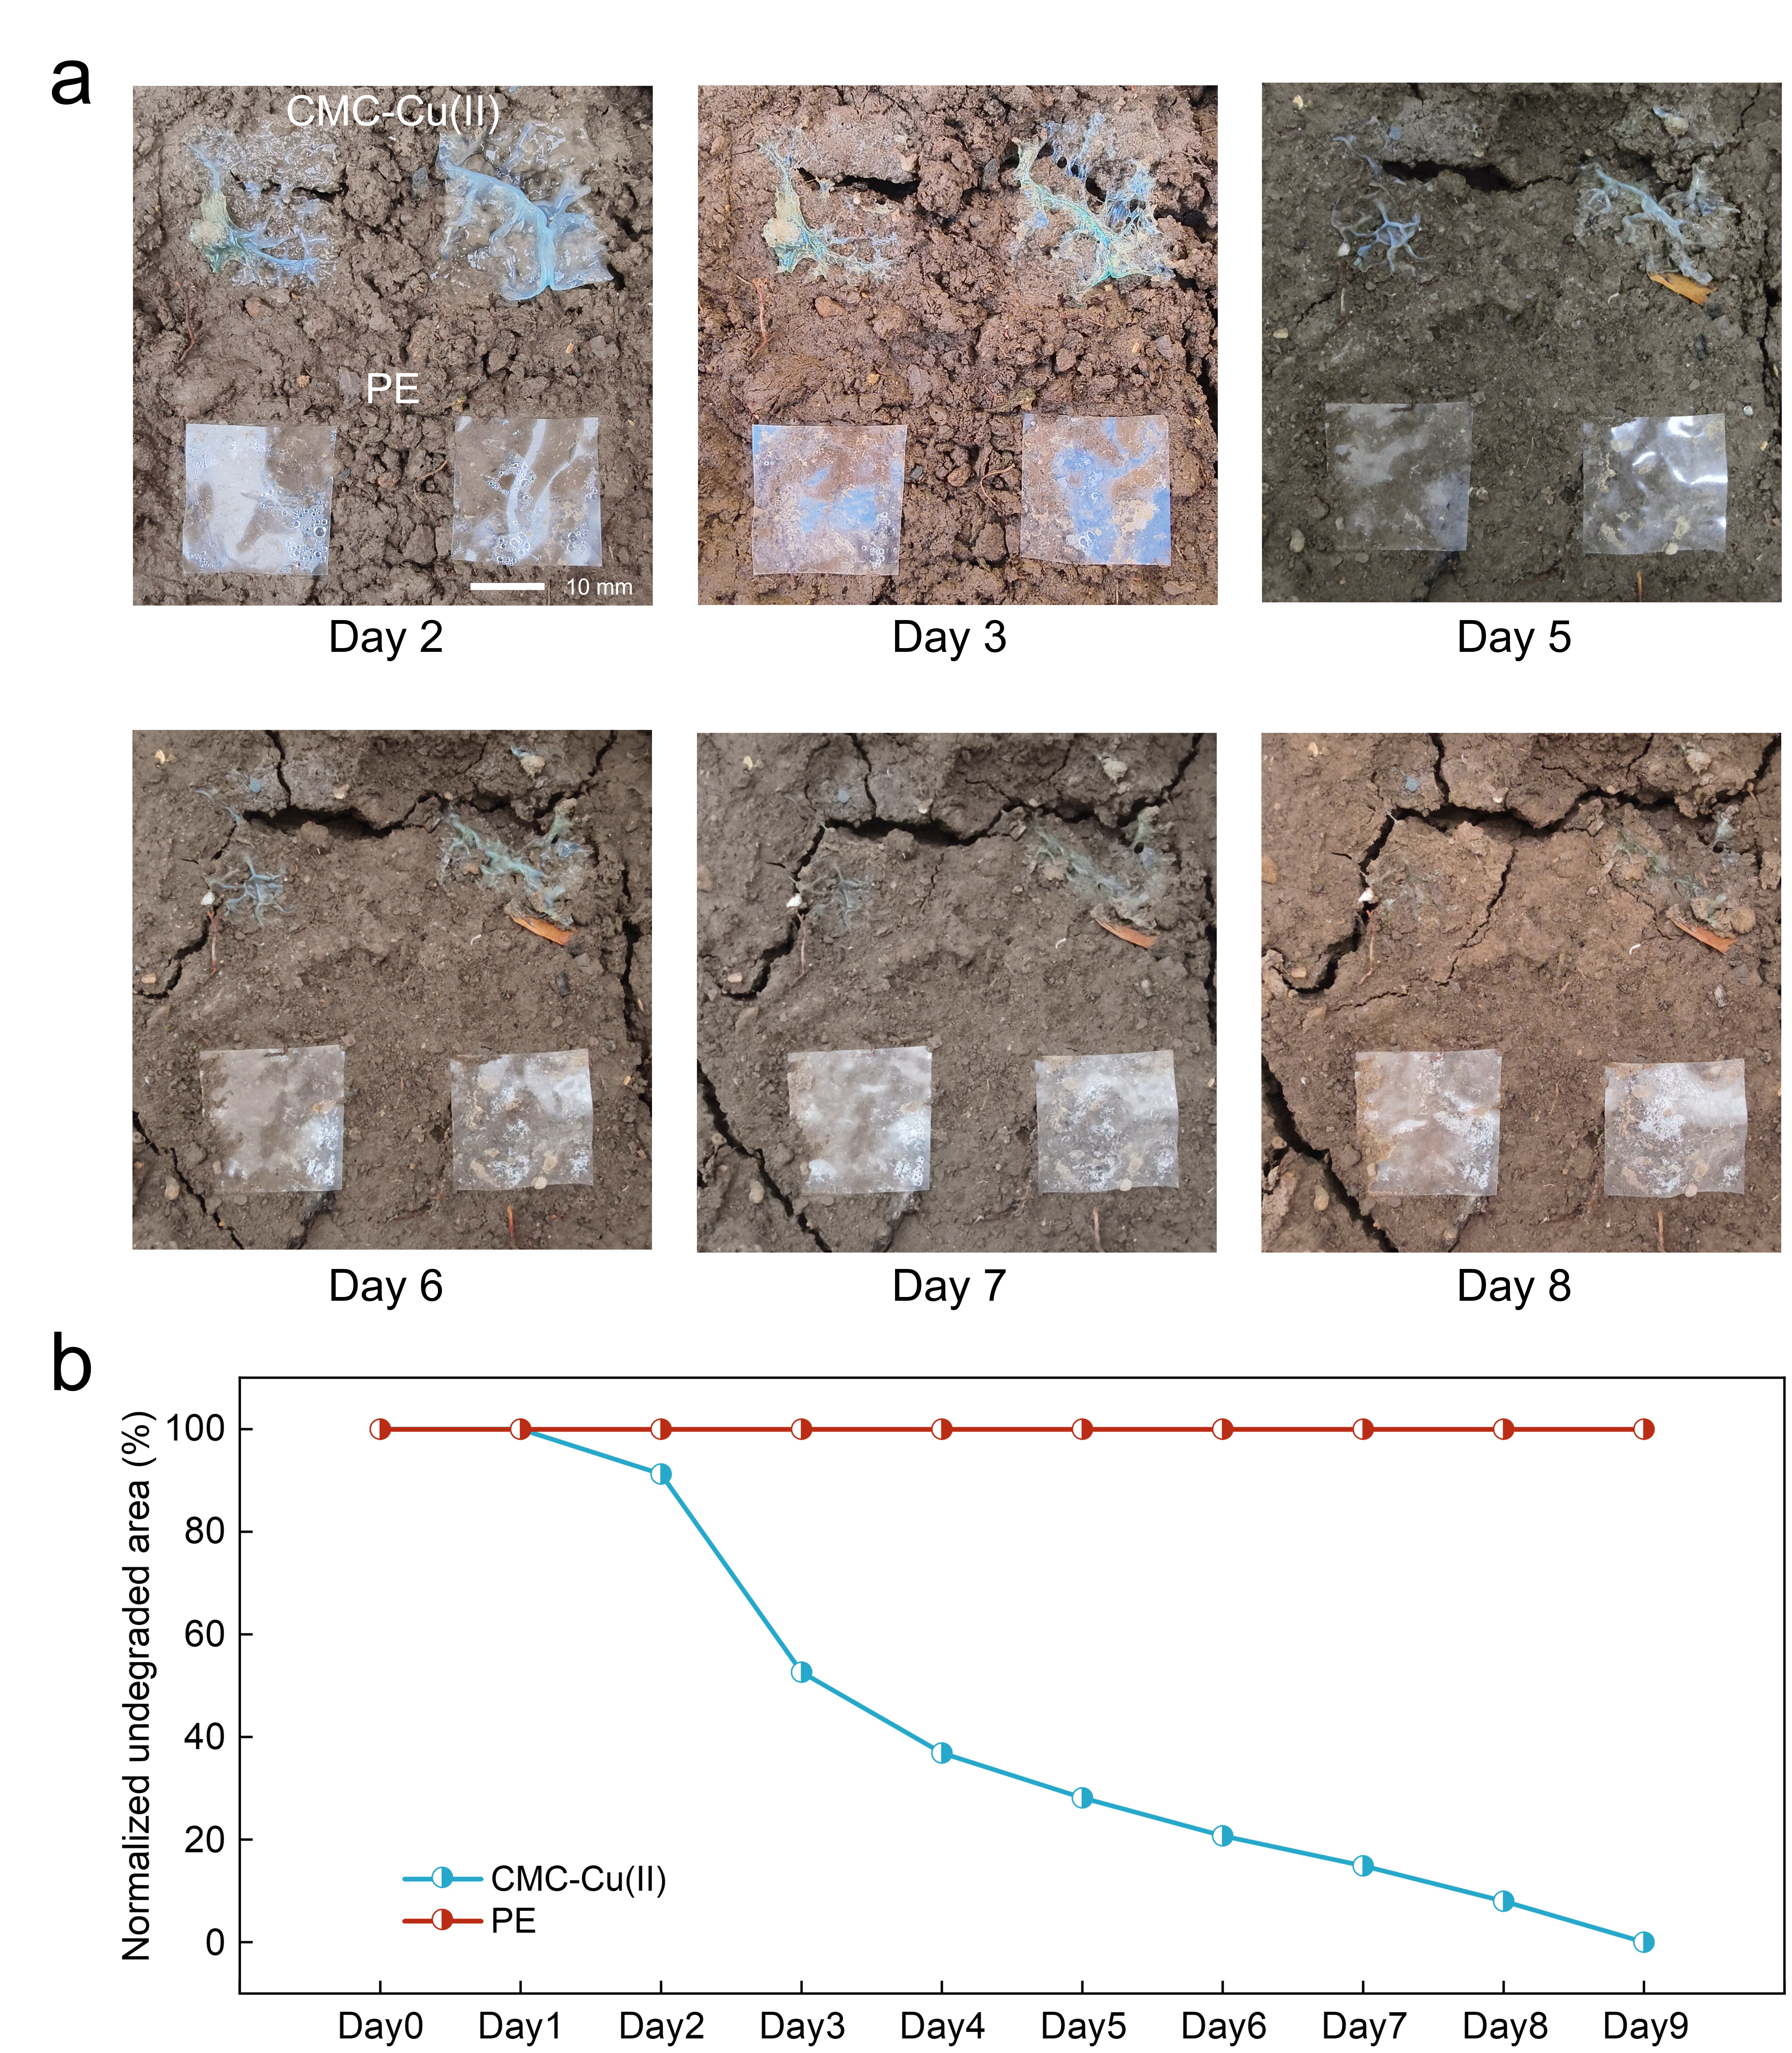
**

Supplementary Fig. 10. Degradation test for CMC-Cu(II) membranes and PE films a The degradation photographs of CMC-Cu(II) membranes and PE films in day 2, 3, 5, 6, 7, and 8. b Normalized visible undegraded area data of CMC-Cu (II) membranes and PE films over a 9-day period.

**
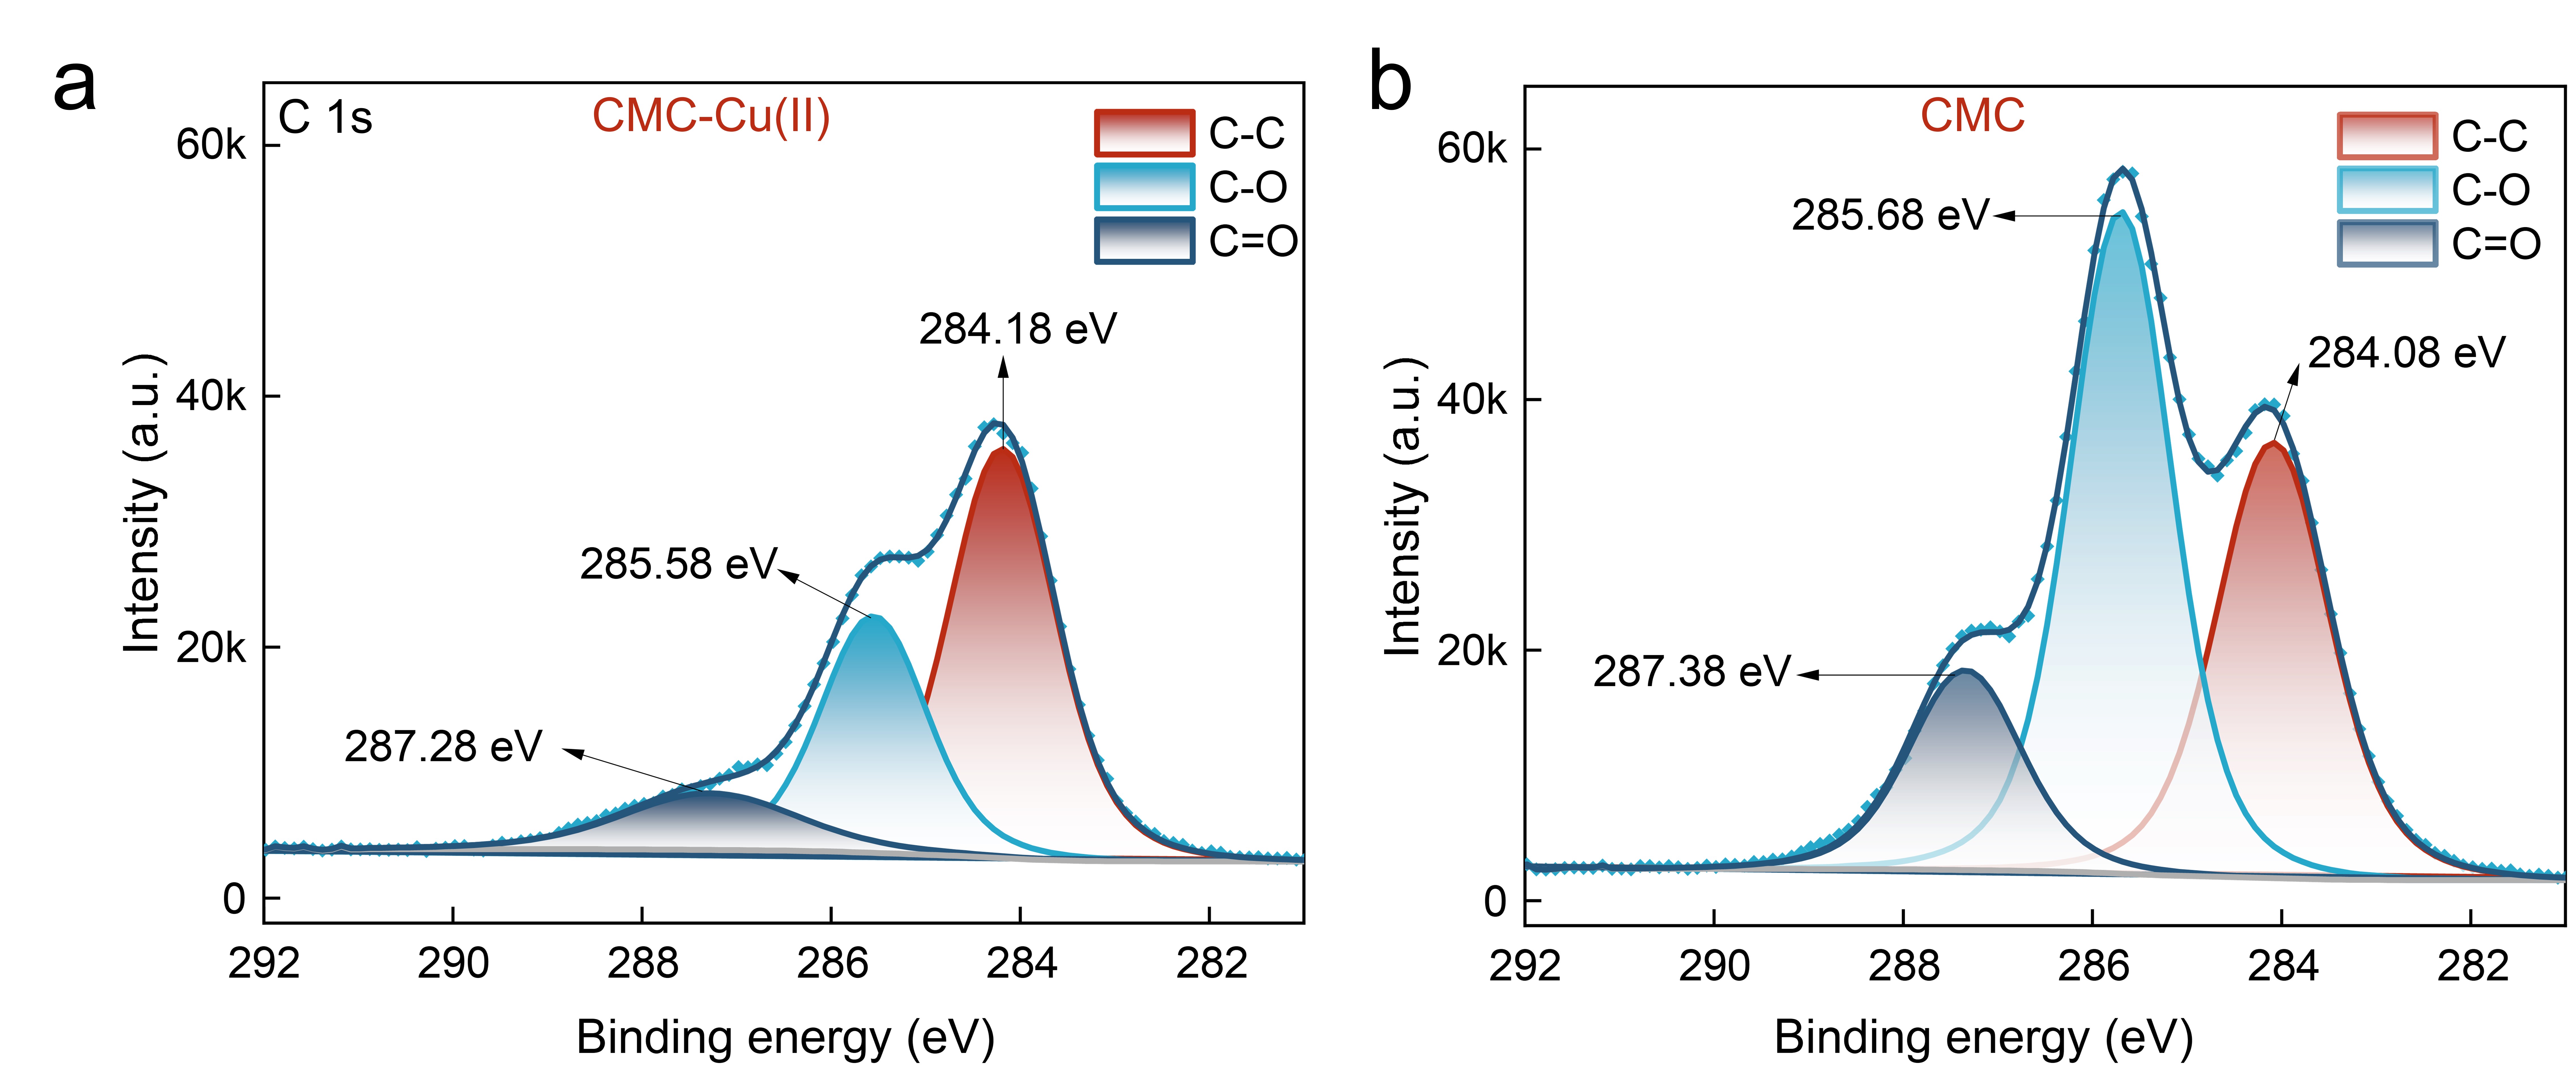
**

Supplementary Fig. 11. The C1s fitted curves of CMC-Cu (a) and CMC (II) (b) membranes, demonstrating a significant reduction in the C-O and C=O functional groups in the CMC-Cu(II) membrane, providing strong evidence for the robust coordination between Cu(II) and CMC.

**
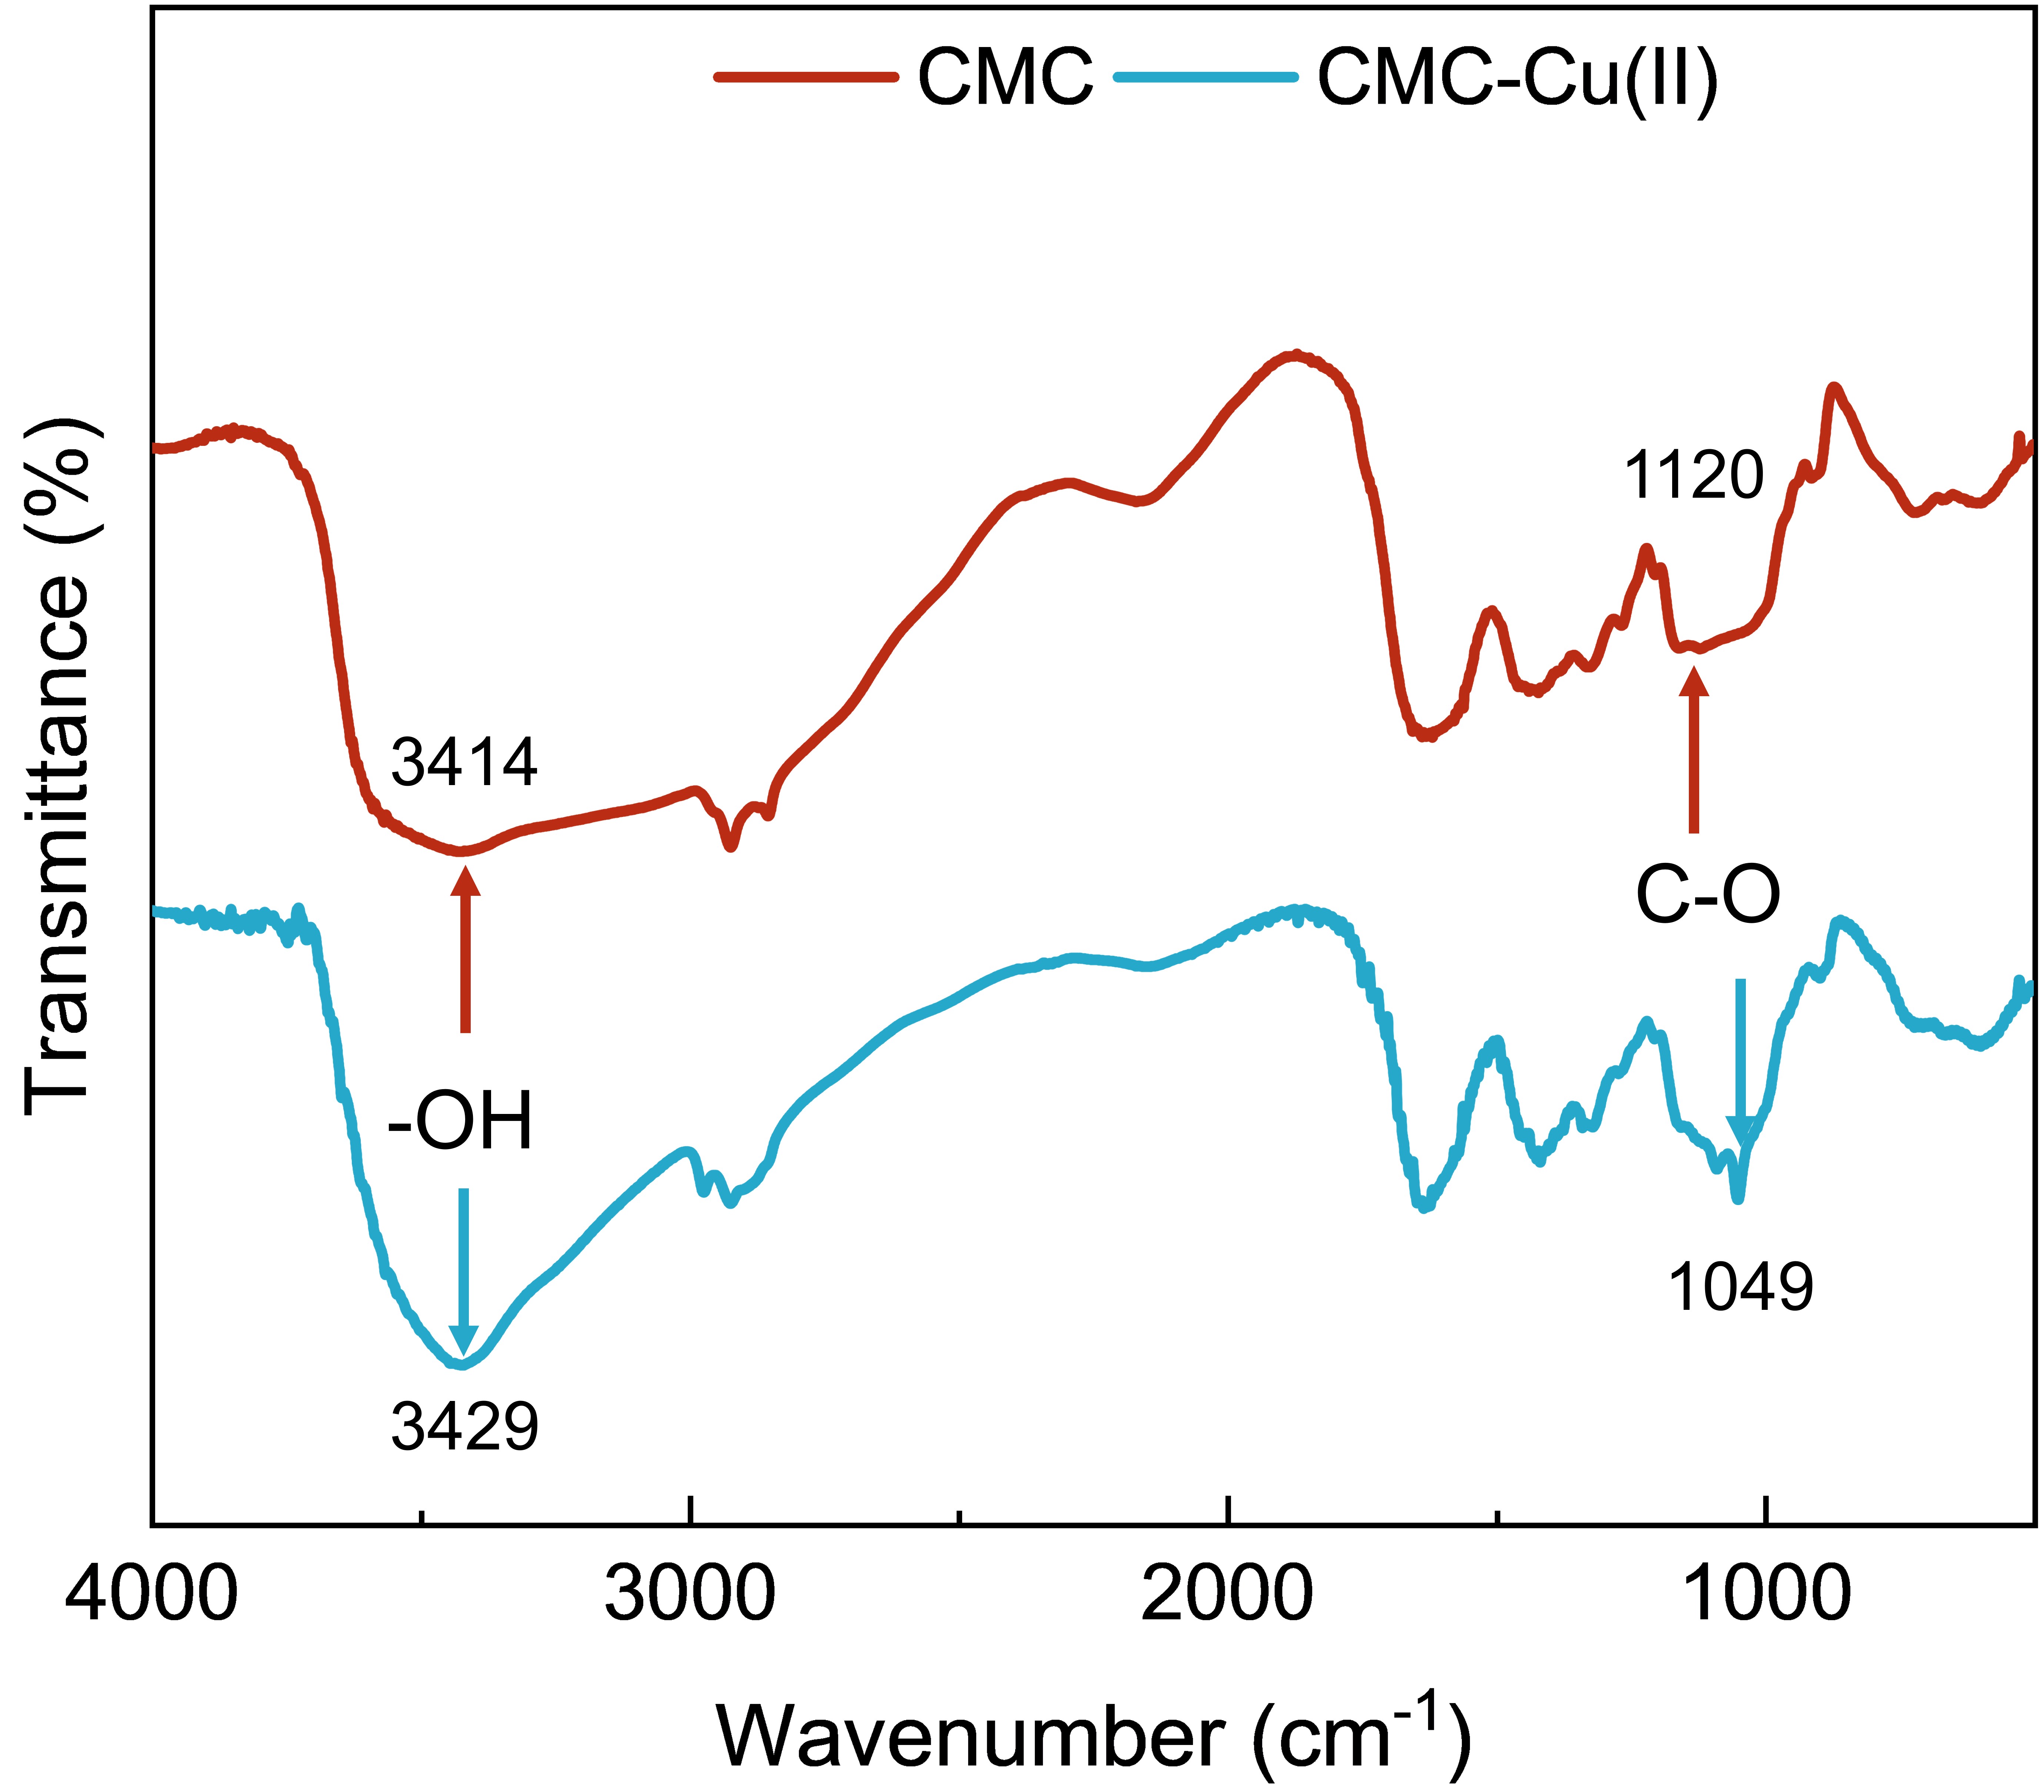
**

**Supplementary Fig. 12.** FTIR spectra of CMC and CMC-Cu(II) membranes. Compared with CMC spectrum, the sharpening of characteristic-OH peaks and the shift towards lower wave numbers in the stretching vibration peaks of C-O observed in CMC-Cu(II) spectrum provide support for the strong coordination between Cu(II) and CMC.

**
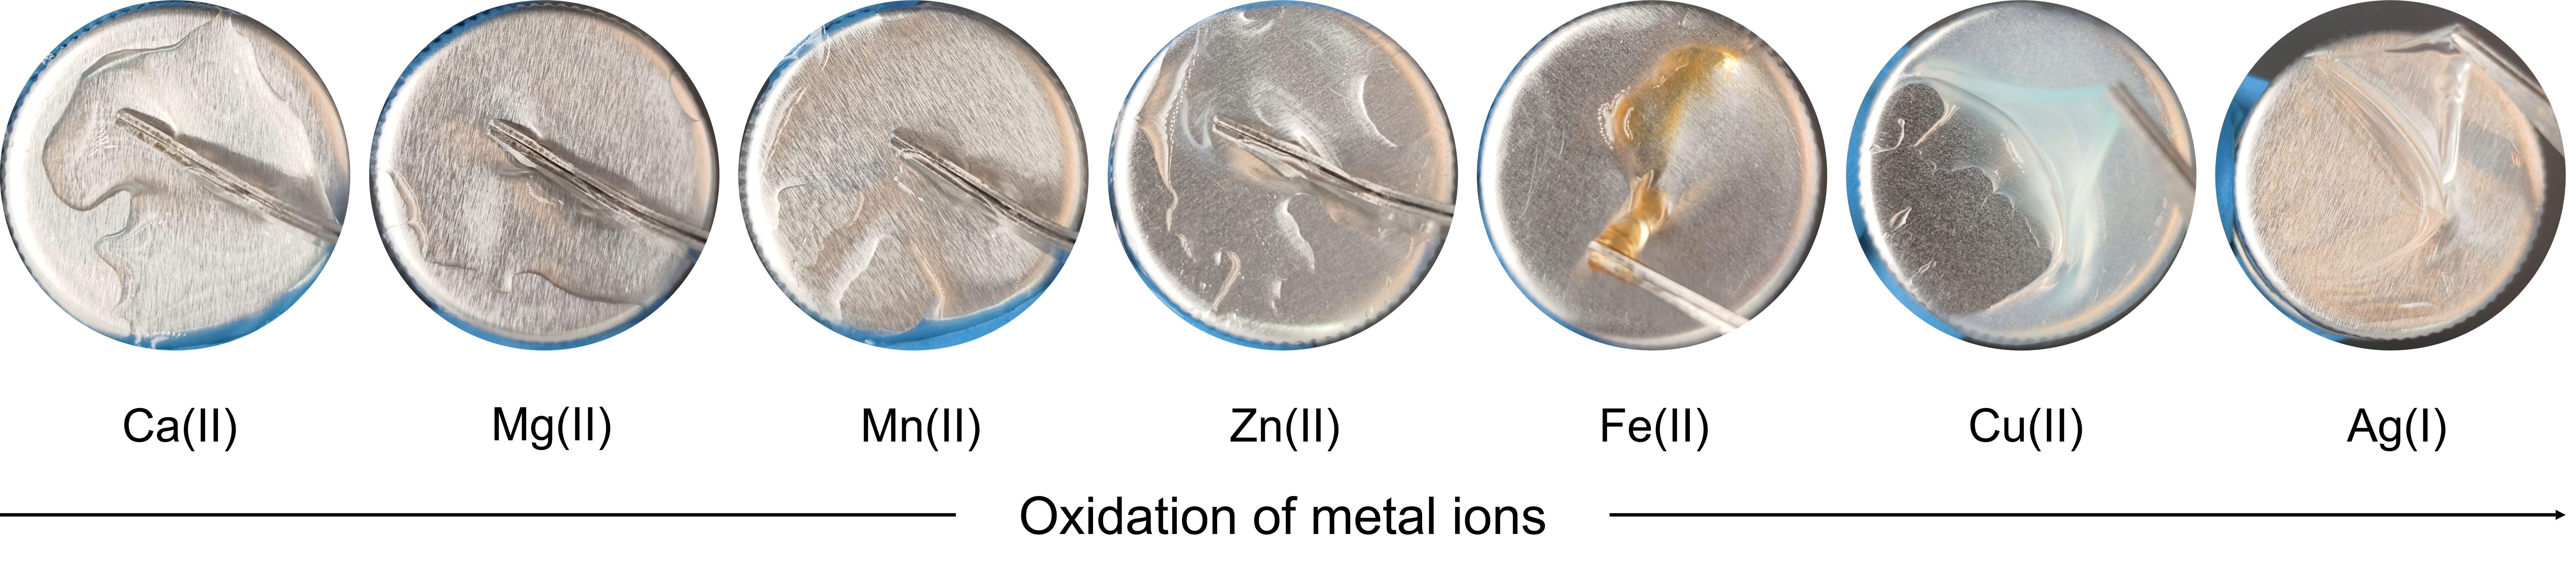
**

Supplementary Fig. 13. The membrane formation behavior of a series of common metal ions with varying oxidation states, including Ca(II), Mg(II), Mn(II), Zn(II), Fe(II), and Ag(I).

**
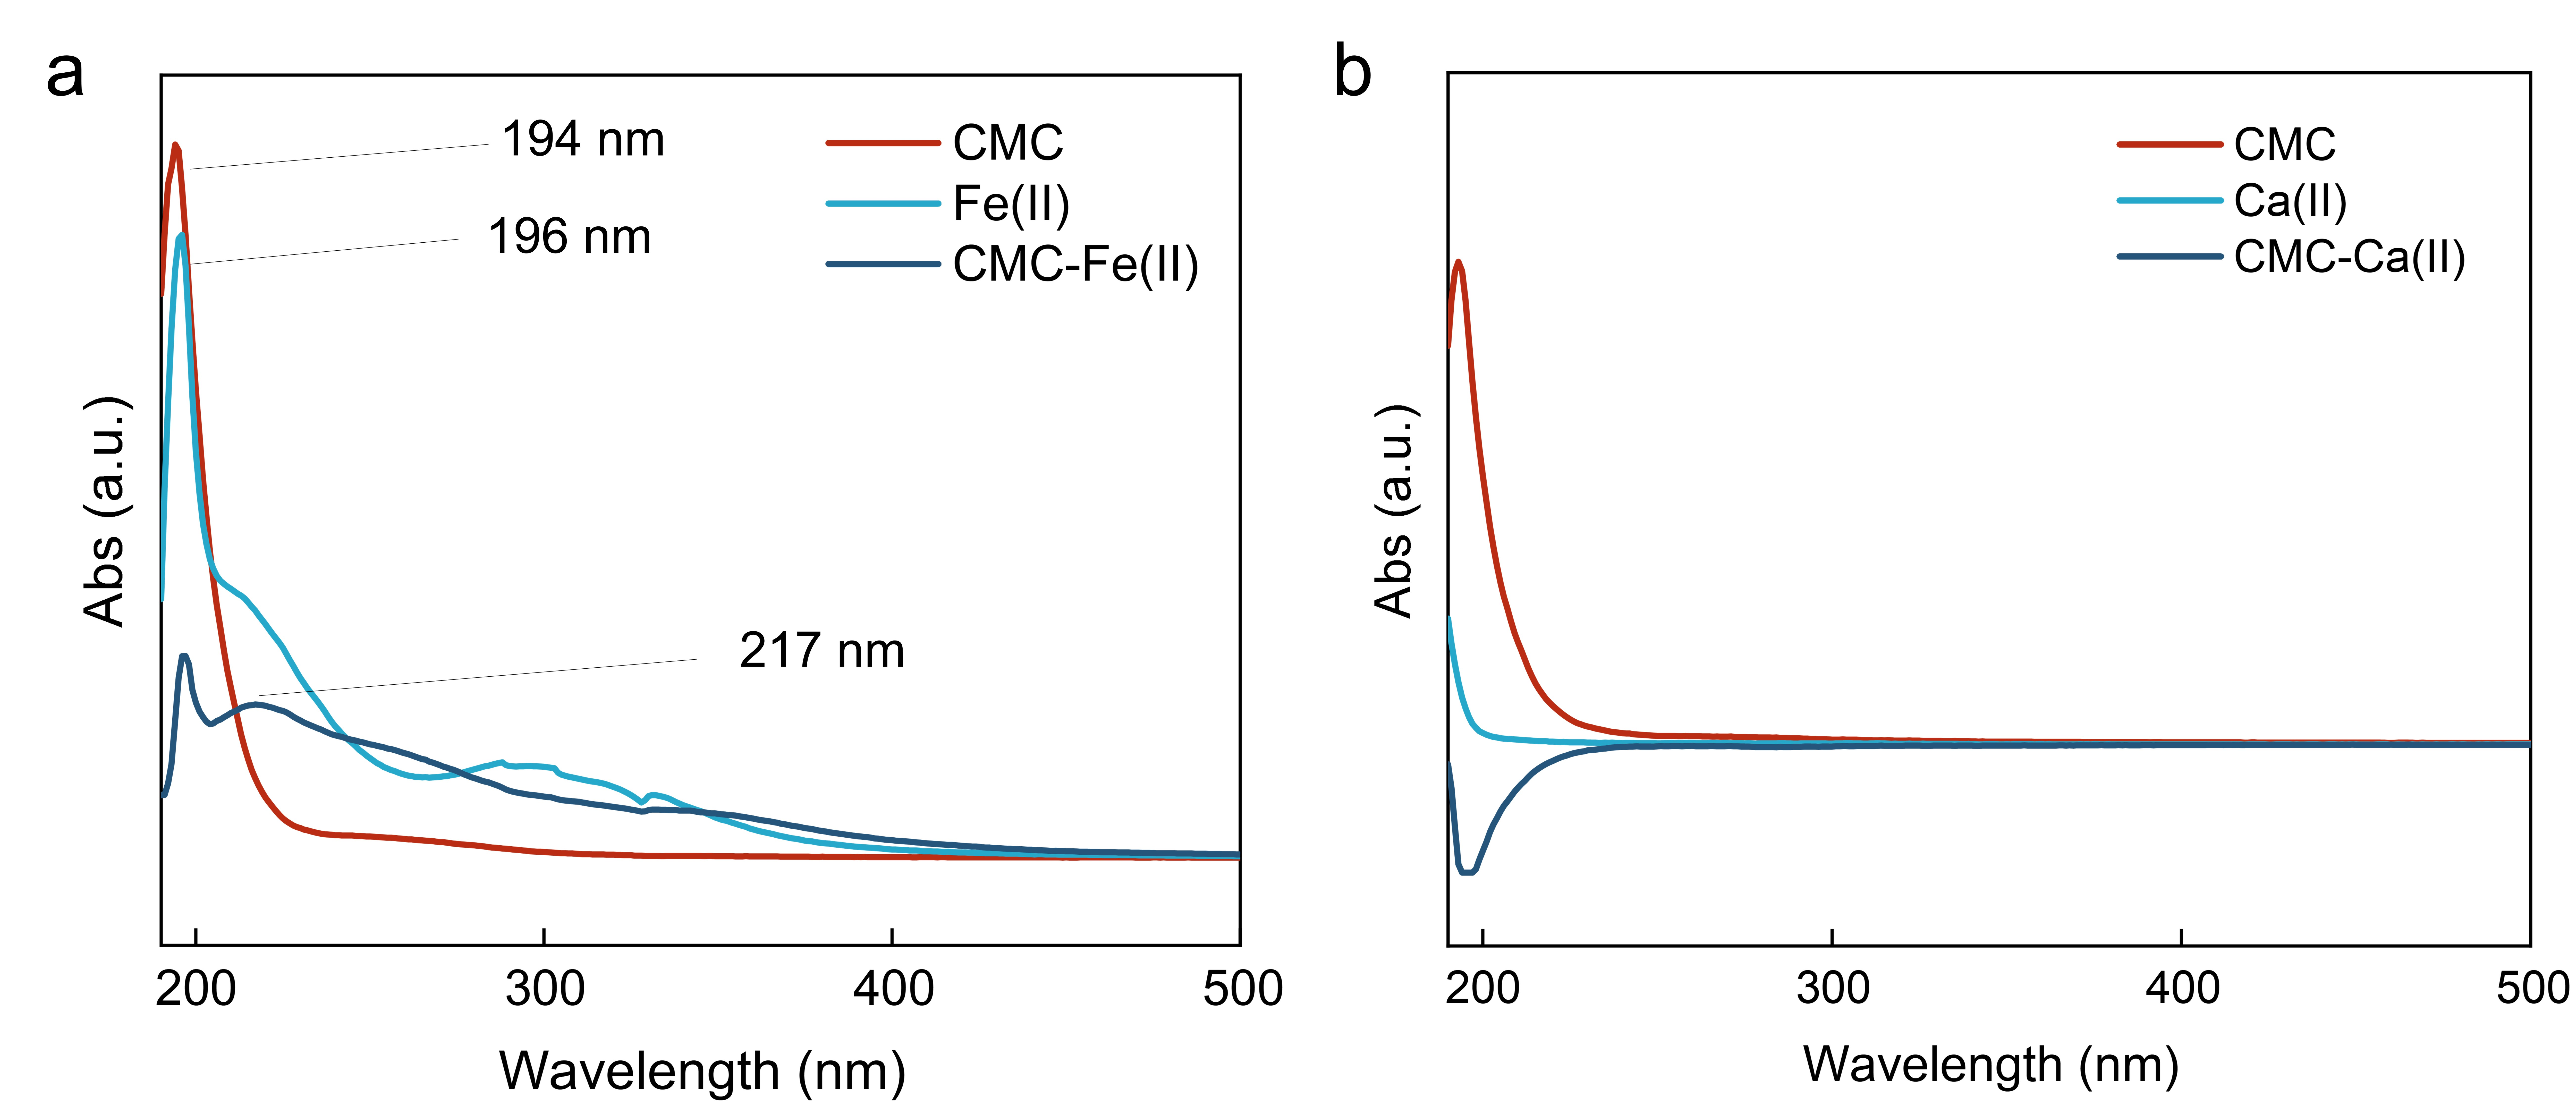
**

Supplementary Fig. 14. The UV absorption spectra of CMC with other metal ions. a UV absorption spectra of CMC, Fe(II), and CMC-Fe(II), inducing a new UV absorption peak of CMC-Fe(II) in a comparison with CMC and Fe(II). b UV absorption curves of CMC, Ca(II), and CMC-Ca(II), exhibiting a negative UV absorption peak in a comparison with CMC and Ca(II). The emerging of a negative UV absorption peak of CMC-Ca(II) is assumed to be due to the weak electrostatic attraction or complexation between Ca(II) and CMC, resulting in the formation of certain complexes or microscopic aggregates that enhance light scattering effect and increase light transmittance, thereby manifesting a negative absorption peak.

**
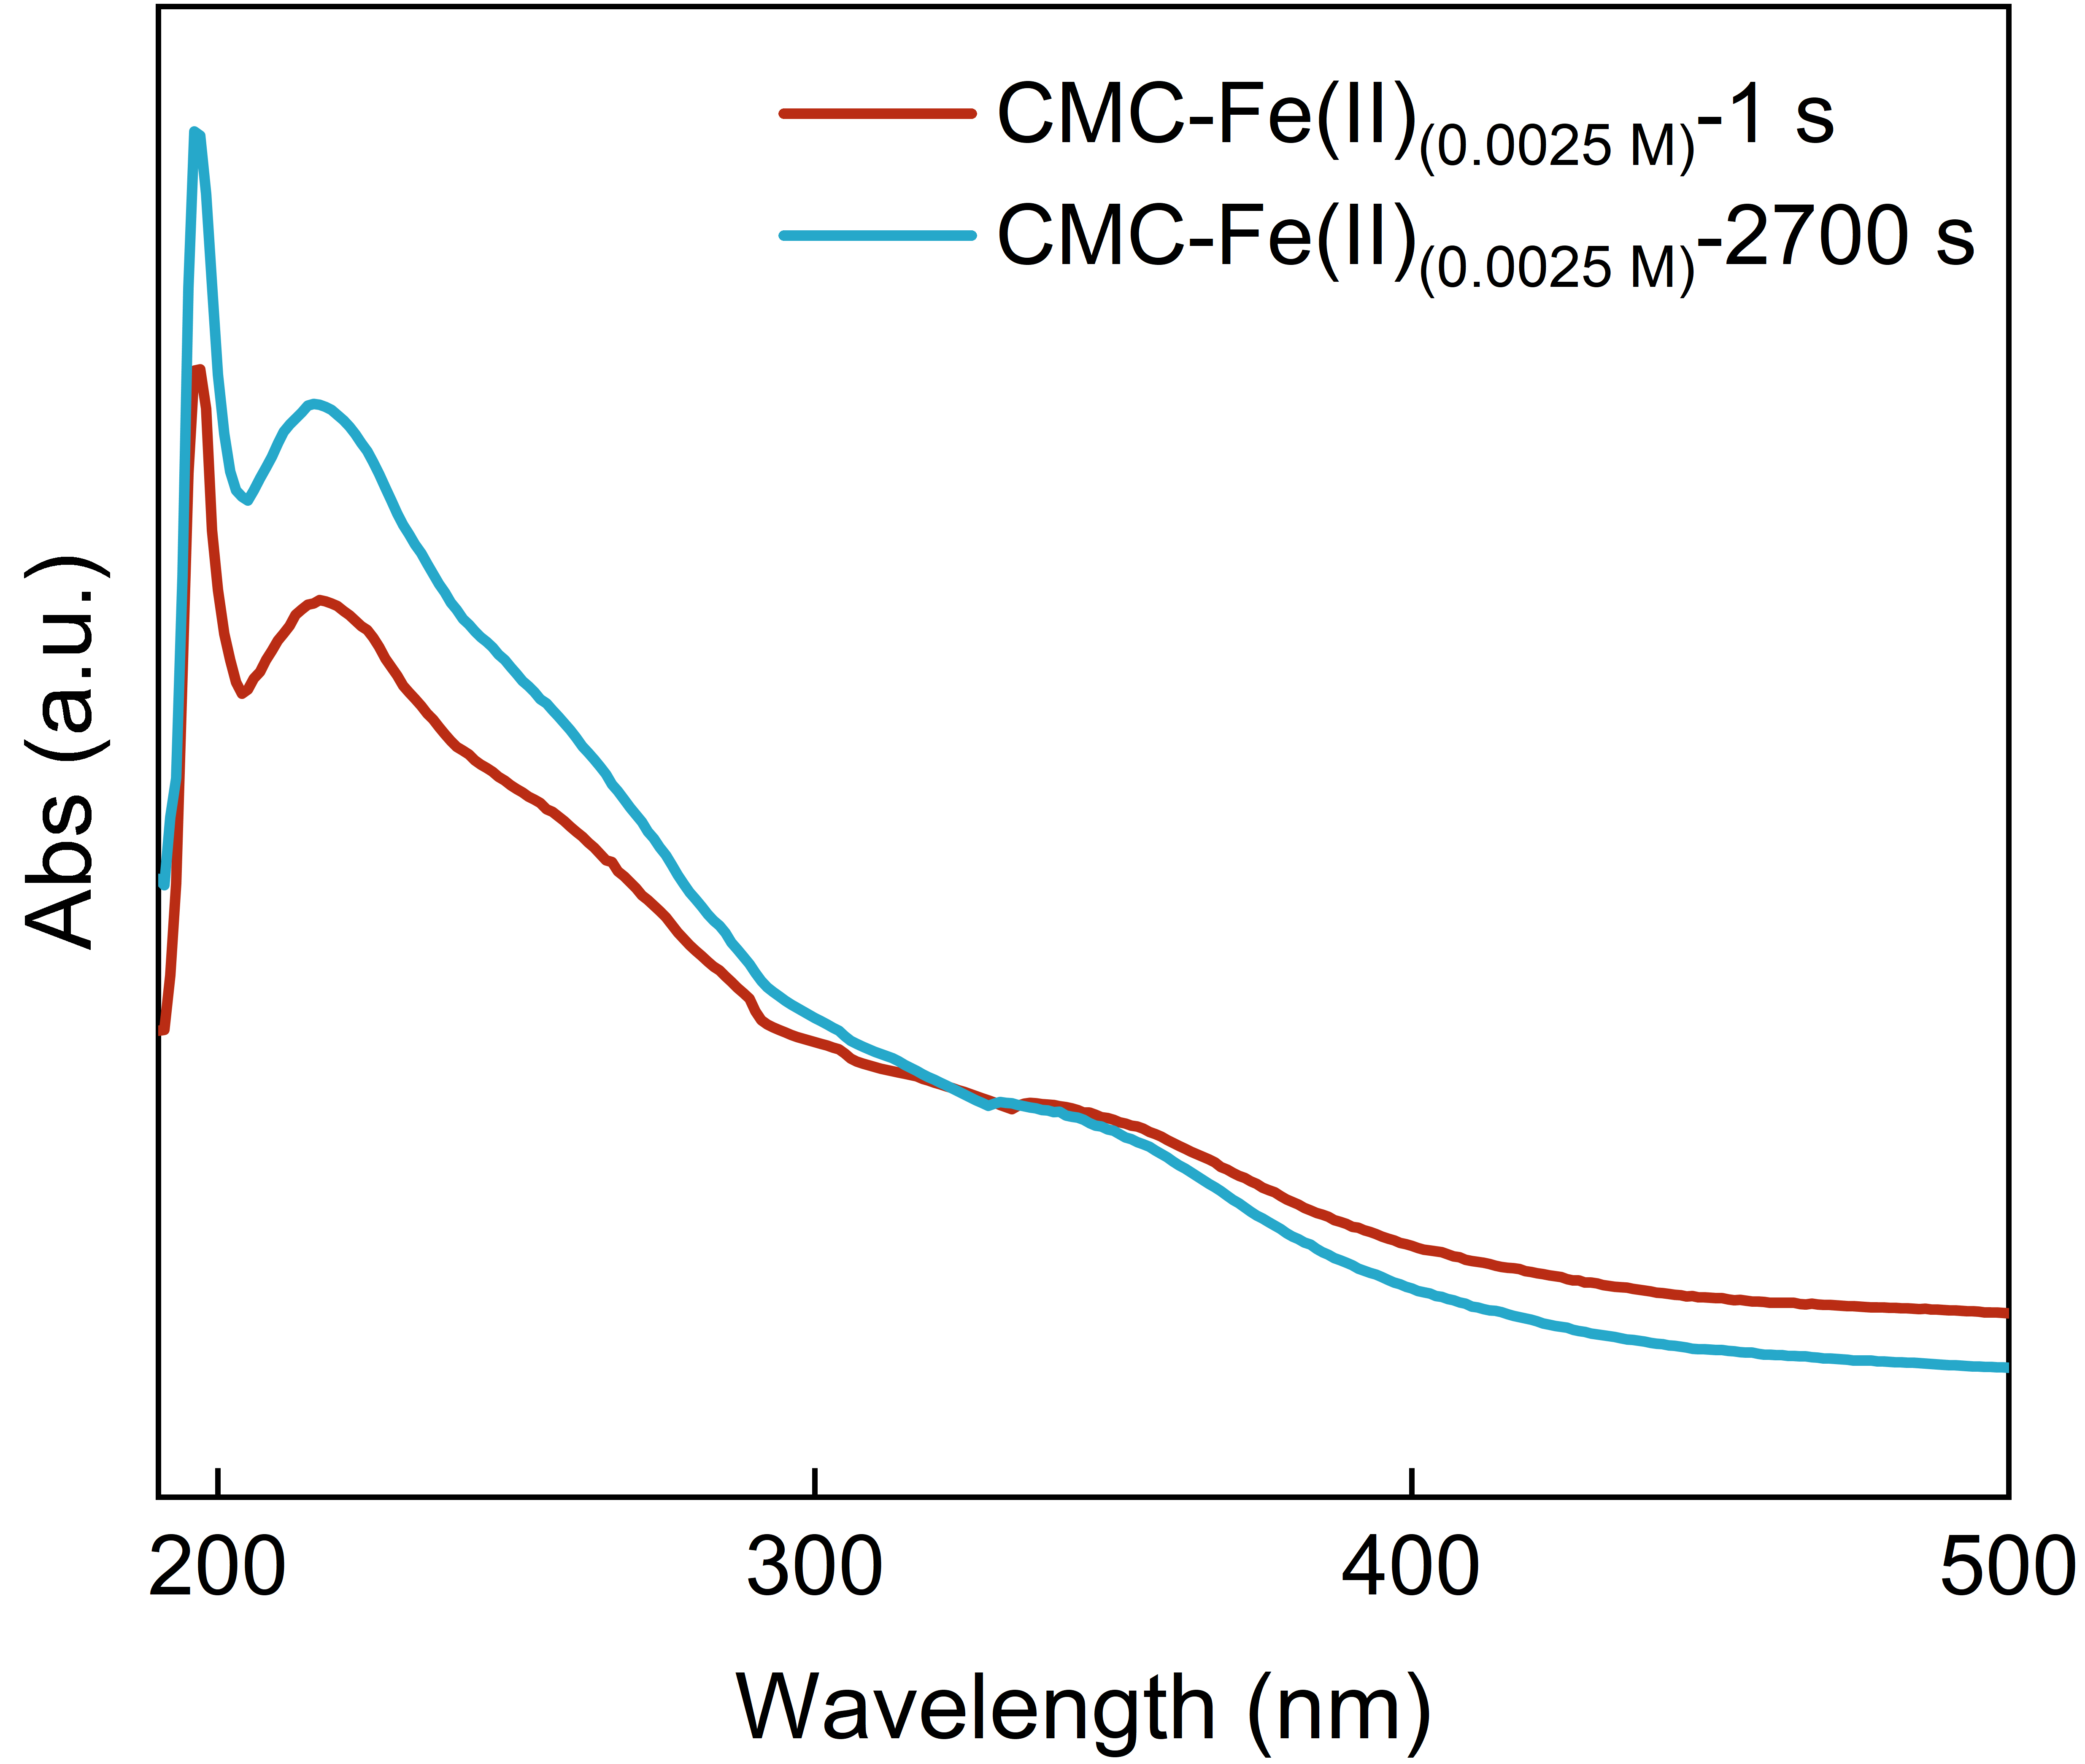
**

Supplementary Fig. 15. The UV curves of CMC-Fe(III) (a) and CMC-Ca(II) (b) with different reaction time. With the extension of reaction time, there was no alteration in the UV absorption peaks of CMC-Fe(III) and CMC-Ca(II), indicating their complete reaction within 1 s during the experiment.

**
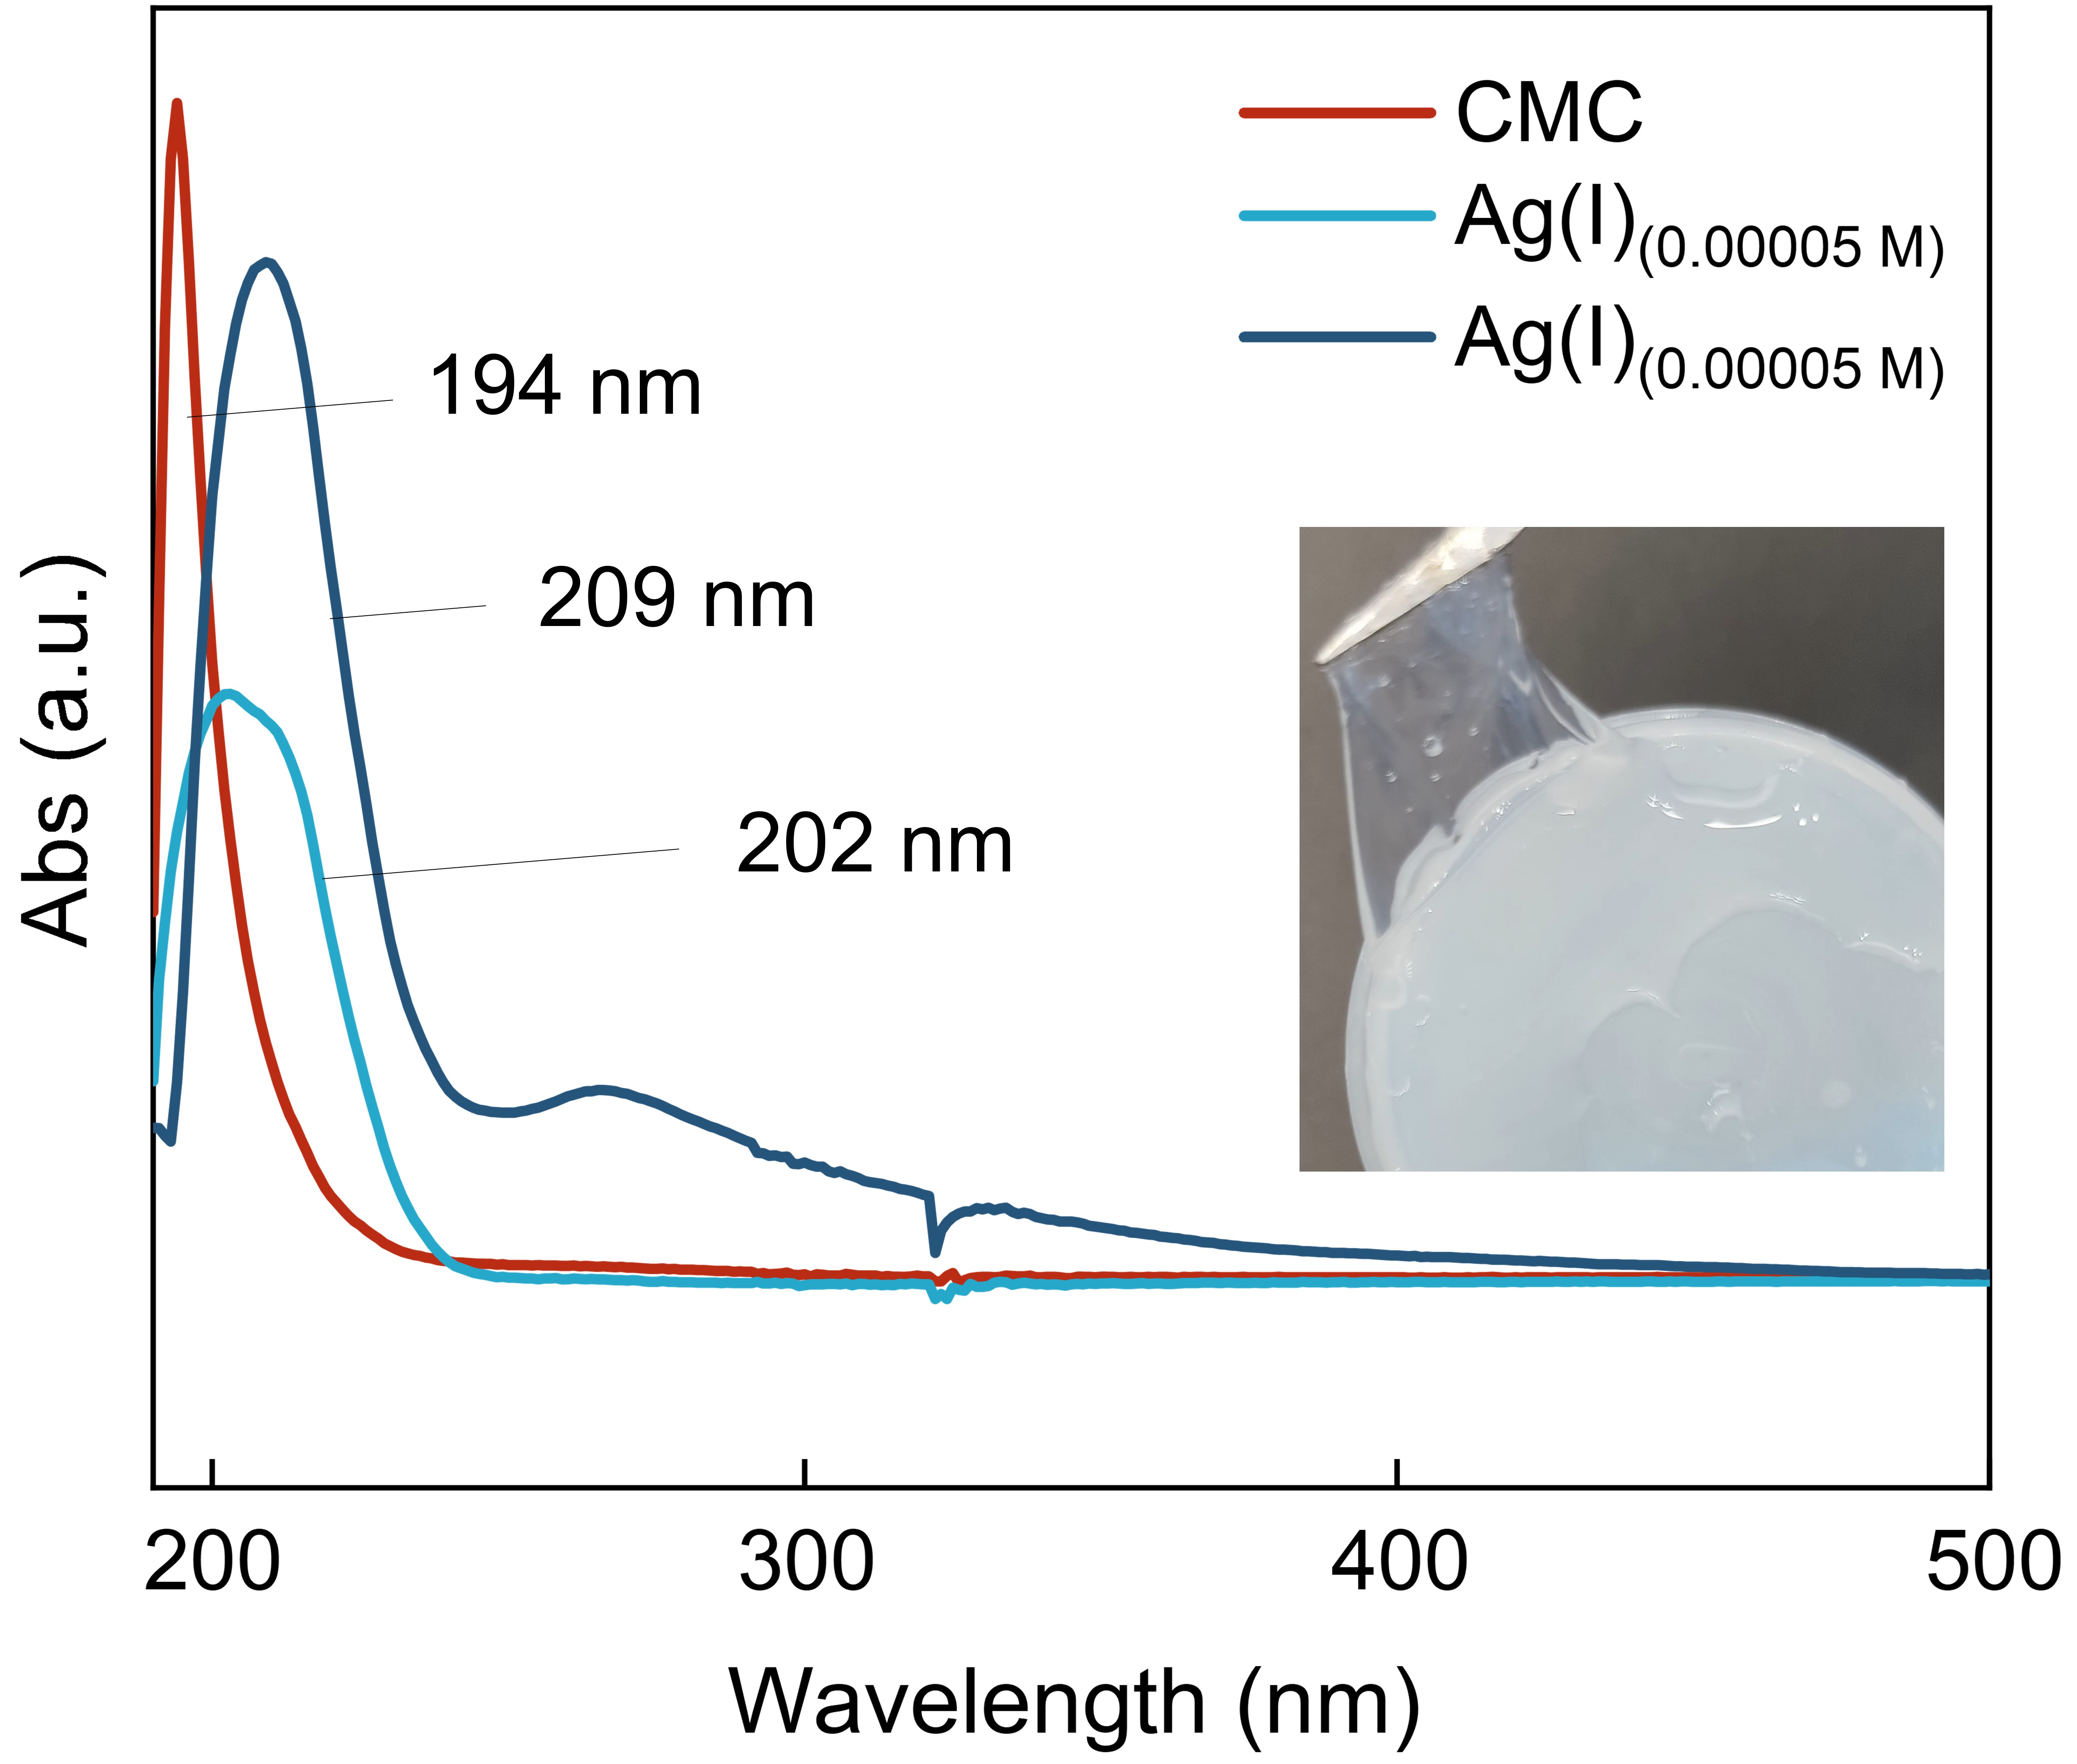
**

Supplementary Fig. 16. The UV absorption spectra of CMC, Ag(I), and CMC-Ag(I), as well as membrane photograph of CMC-Ag(I), illustrating the coordination interaction between CMC and Ag(I).


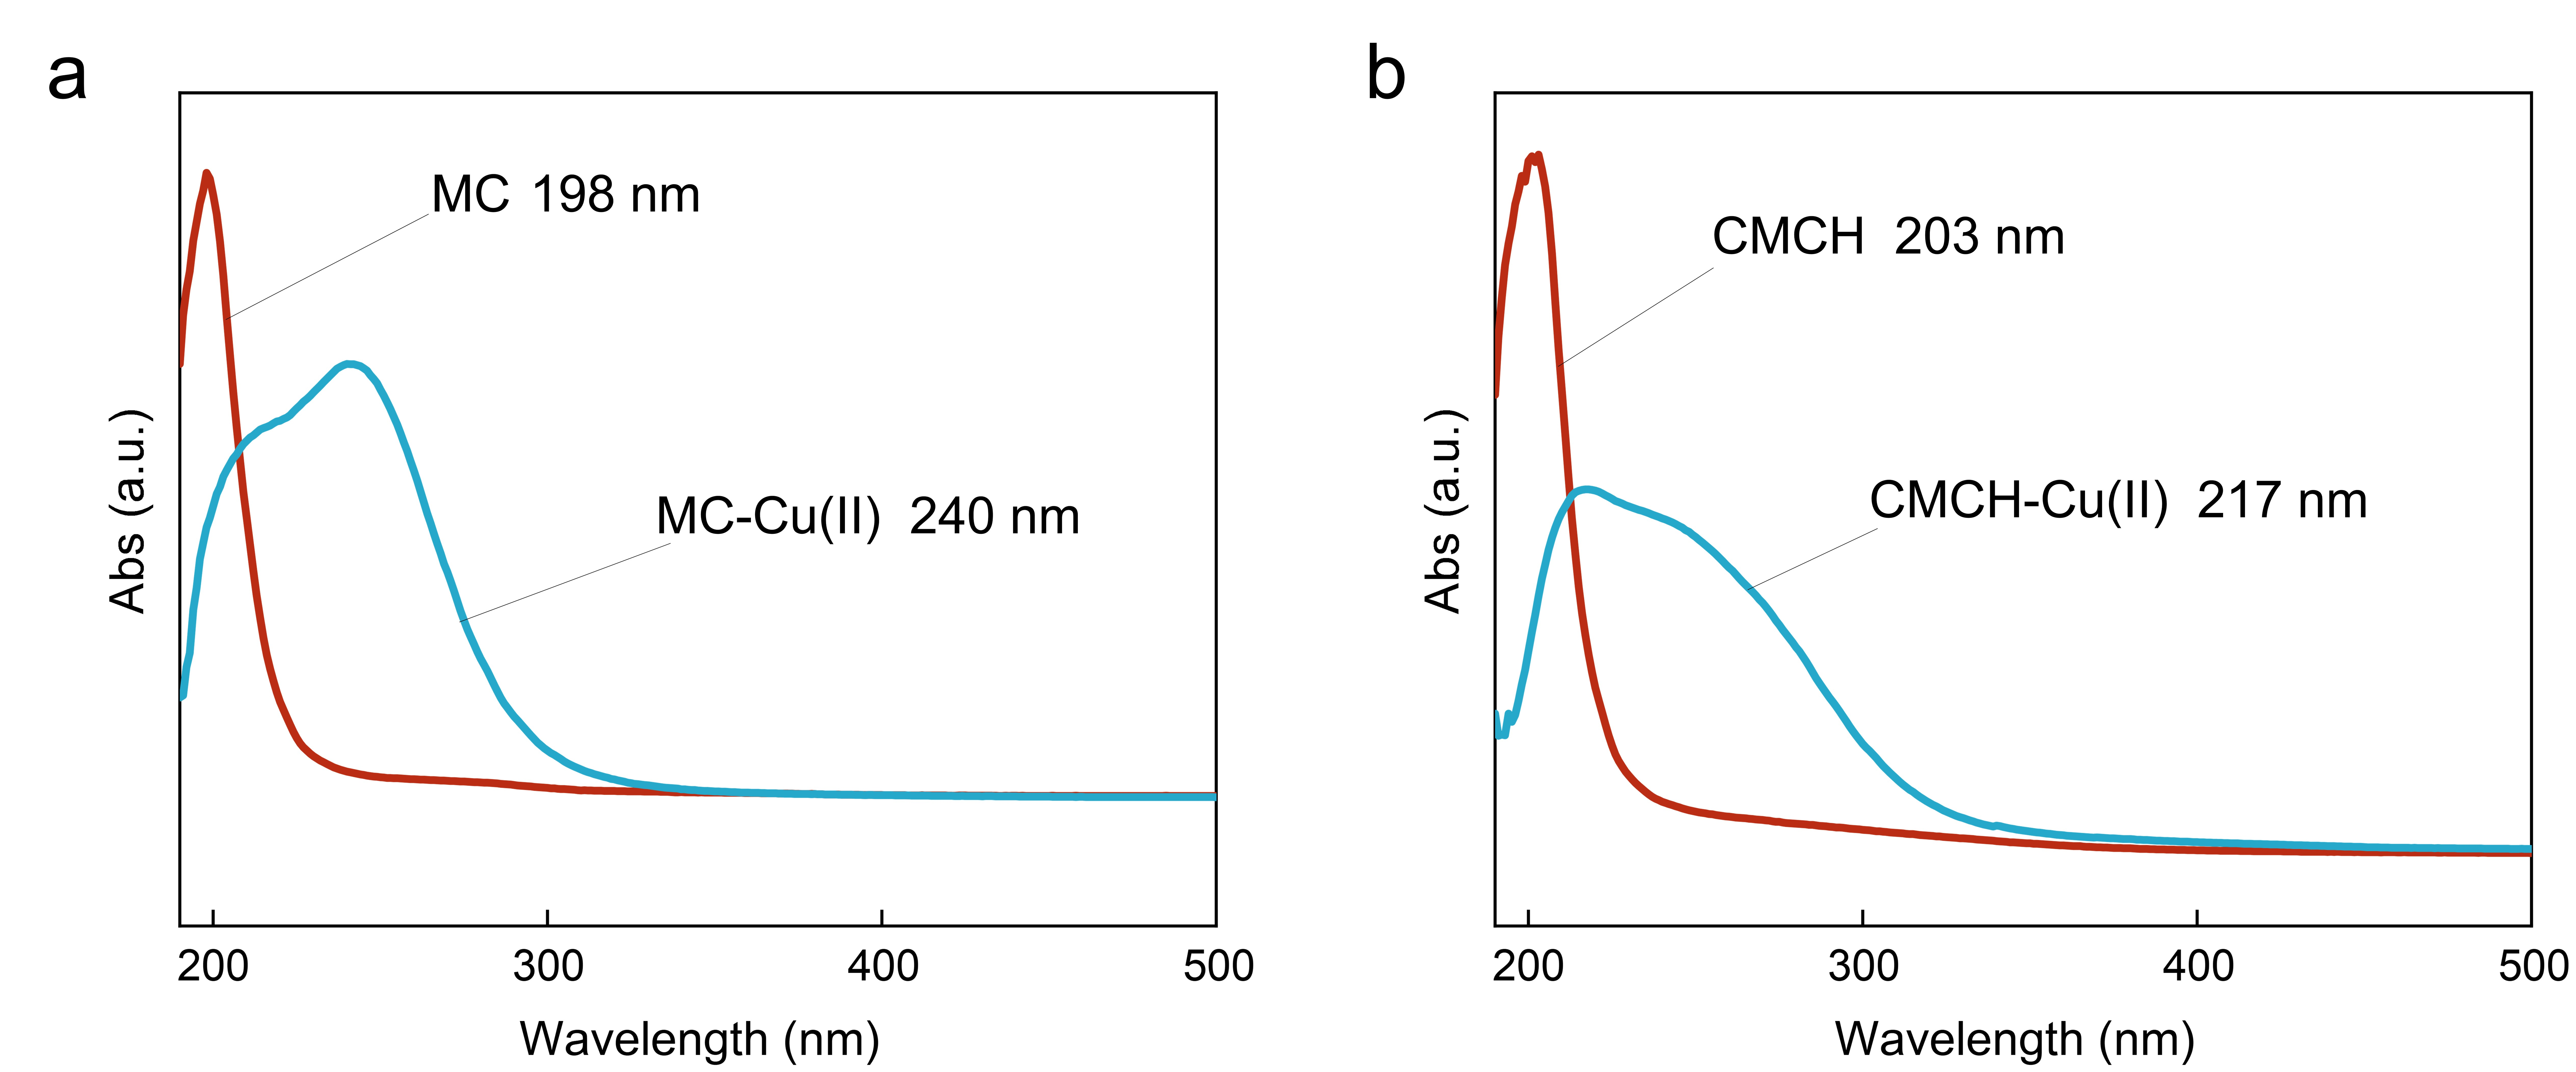


Supplementary Fig. 17. The UV absorption spectra of other biomacromolecule-metal ions. a UV absorption spectra of MC and MC-Cu(II), inducing a new UV absorption peak of MC-Cu(II) compared with MC. b UV absorption curves of CMCH and CMCH-Cu(II), also exhibiting a new UV absorption peak of CMCH-Cu(II) compared with CMCH.

**
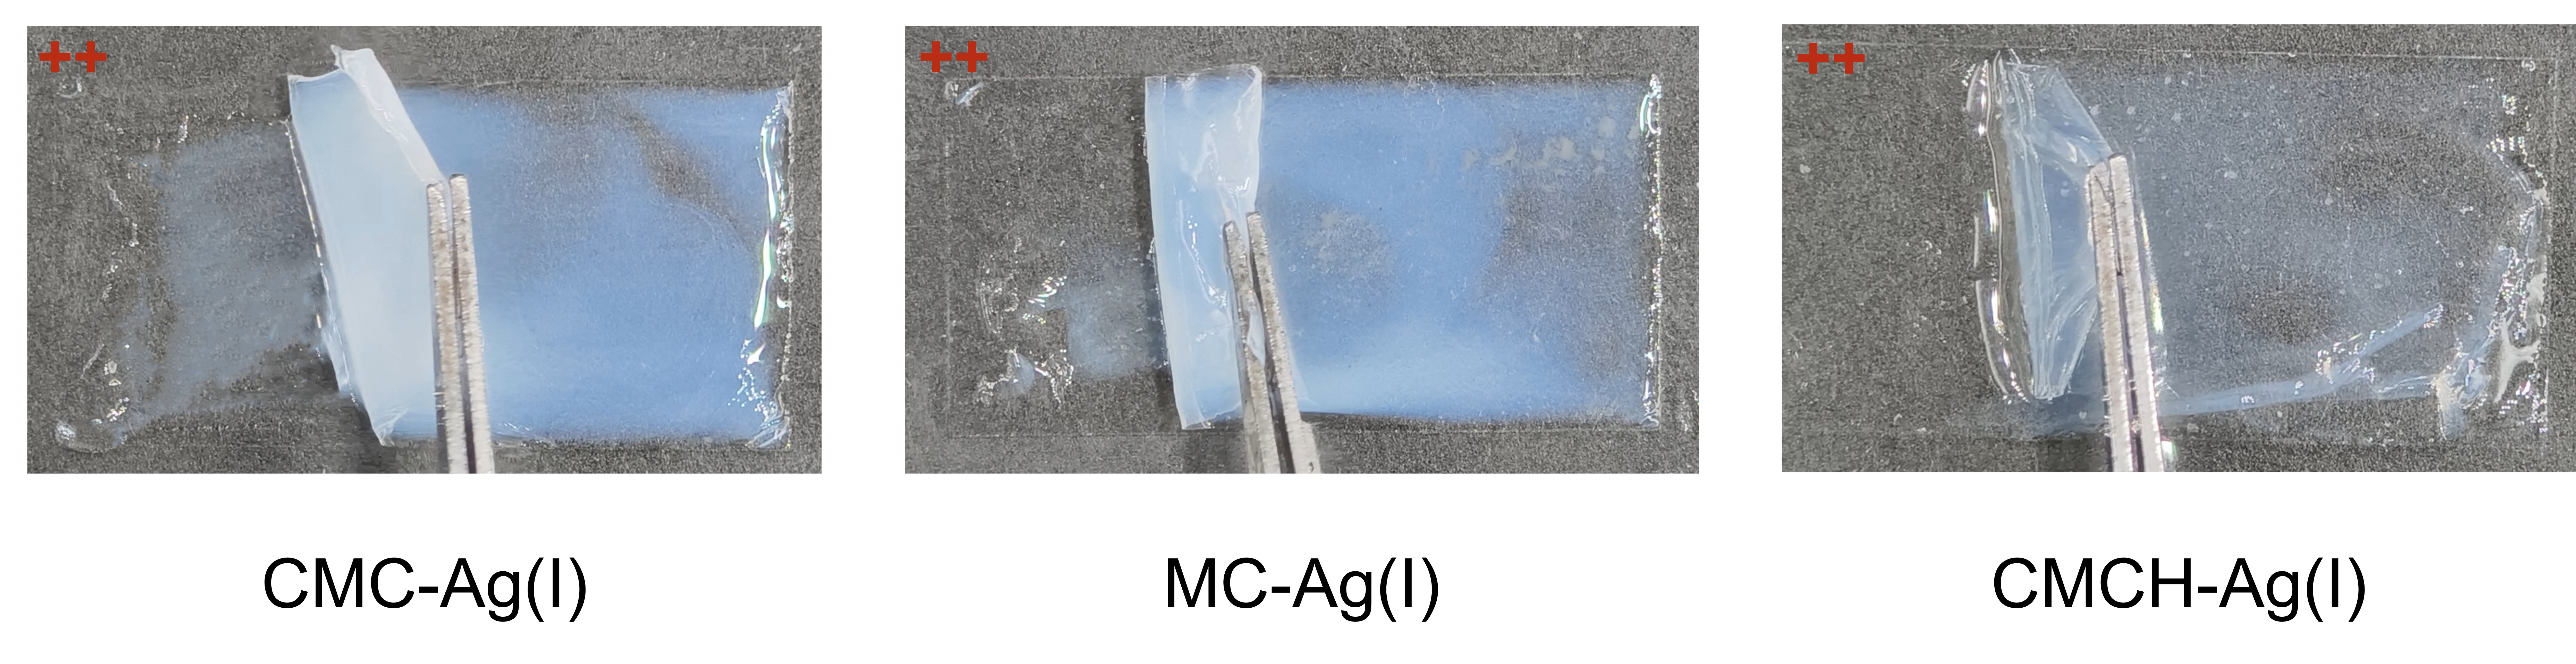
**

Supplementary Fig. 18. Digital photographs of CMC-Ag(I), MC-Ag(I), and CMCH-Ag(I) membranes formed by Ag(I) coordination.

**
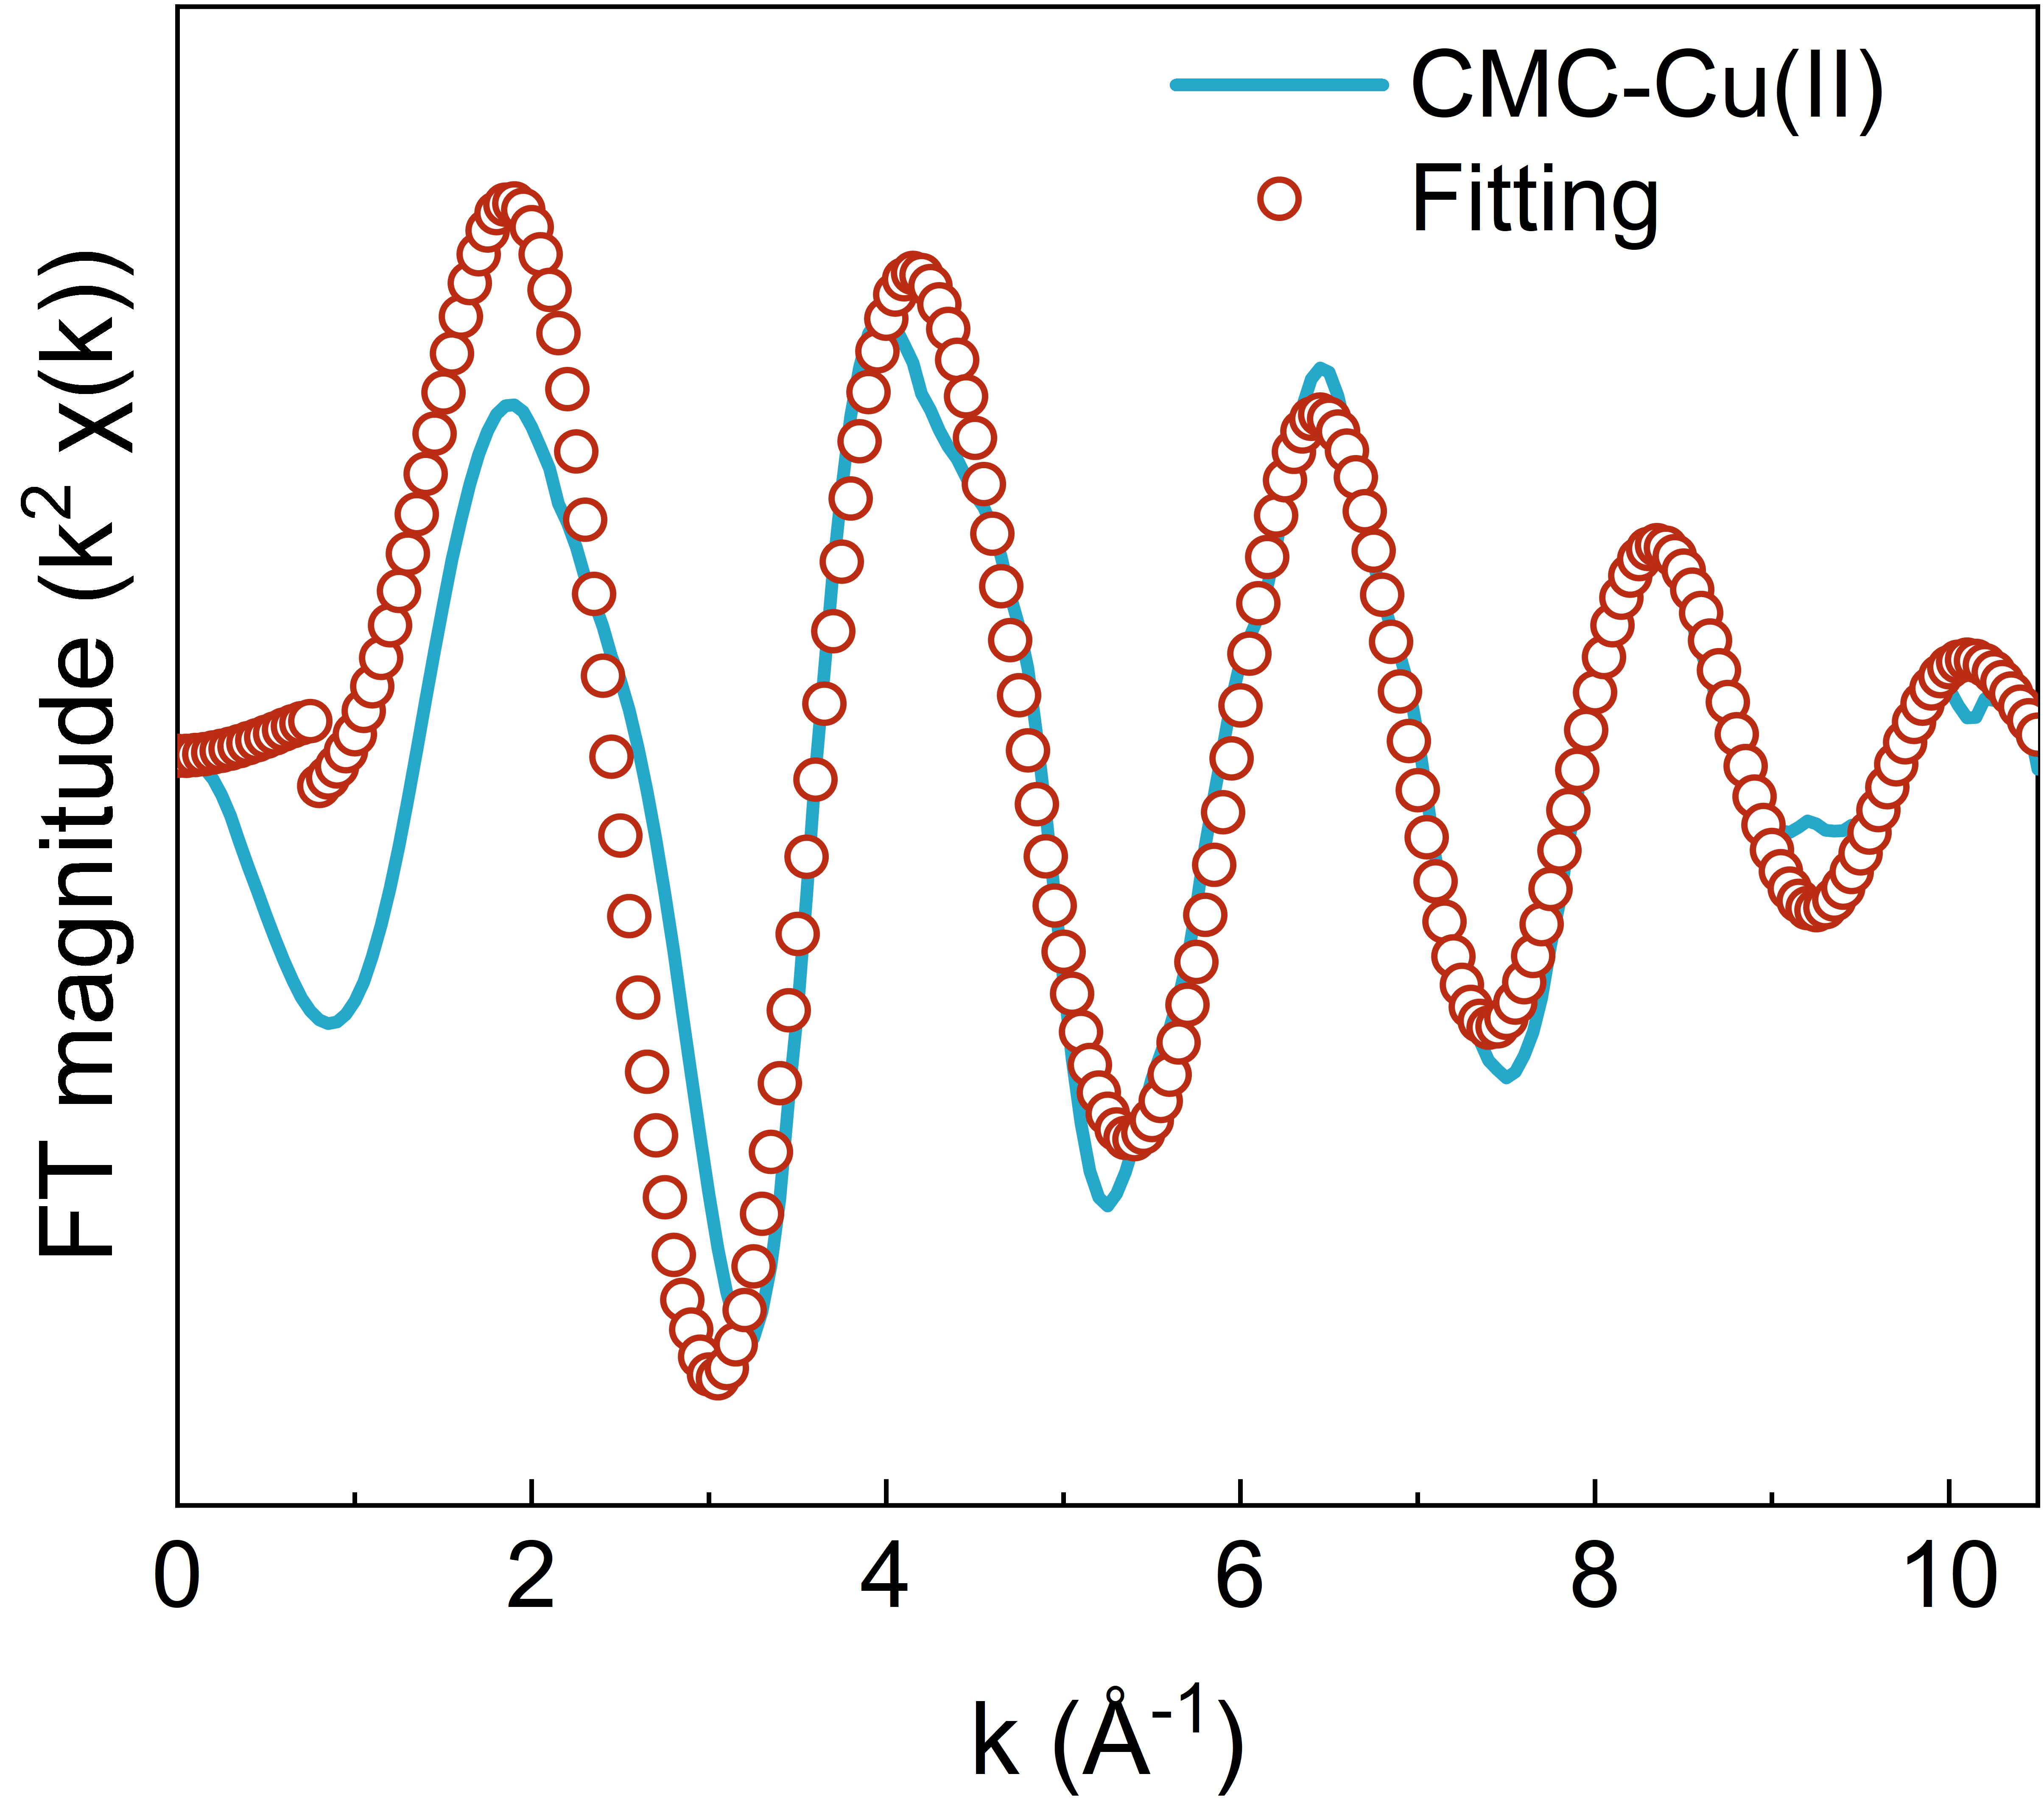
**

Supplementary Fig. 19. K-space EXAFS spectrum of CMC-Cu(II) and the corresponding fitting curve. FT, Fourier transform.


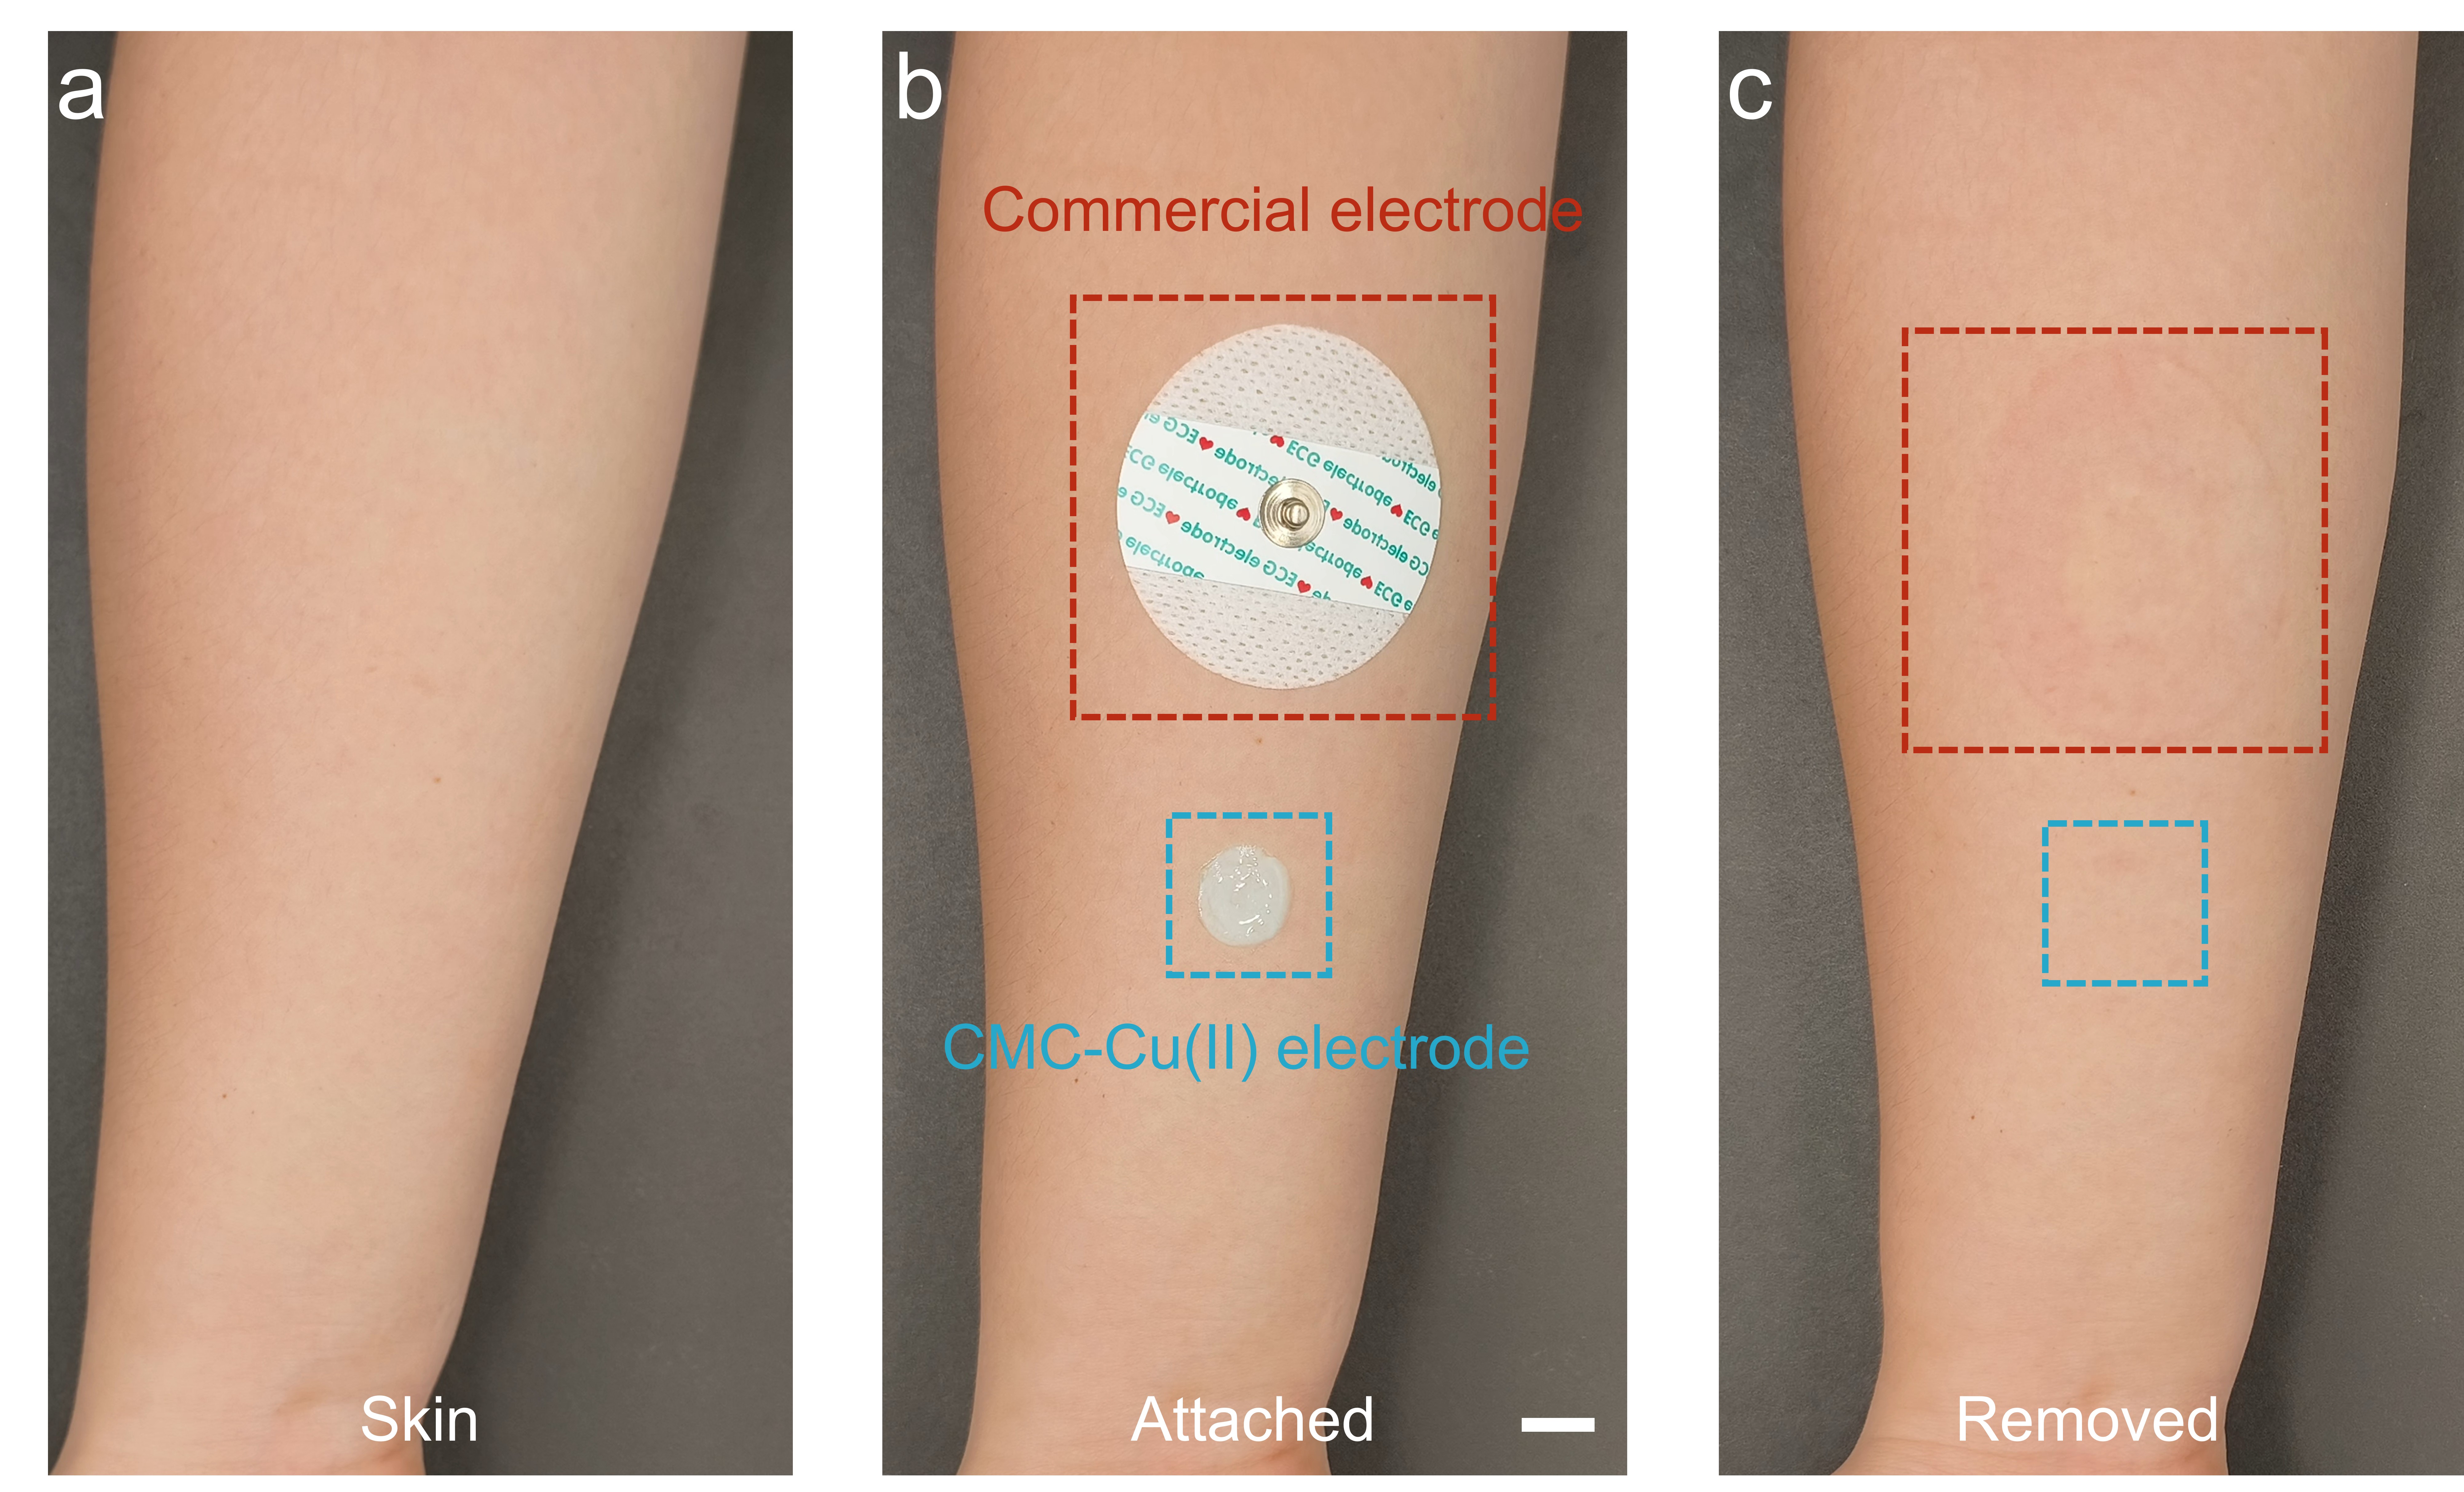


Supplementary Fig. 20. Optical images of the skin surface (a) before, (b) during attachment (one hour), and (c) after removal of CMC-Cu(II) and commercial Ag/AgCl electrodes, visually indicating that the CMC-Cu(II) electrode exerts negligible effects on the skin. Scale bar, 1 cm.


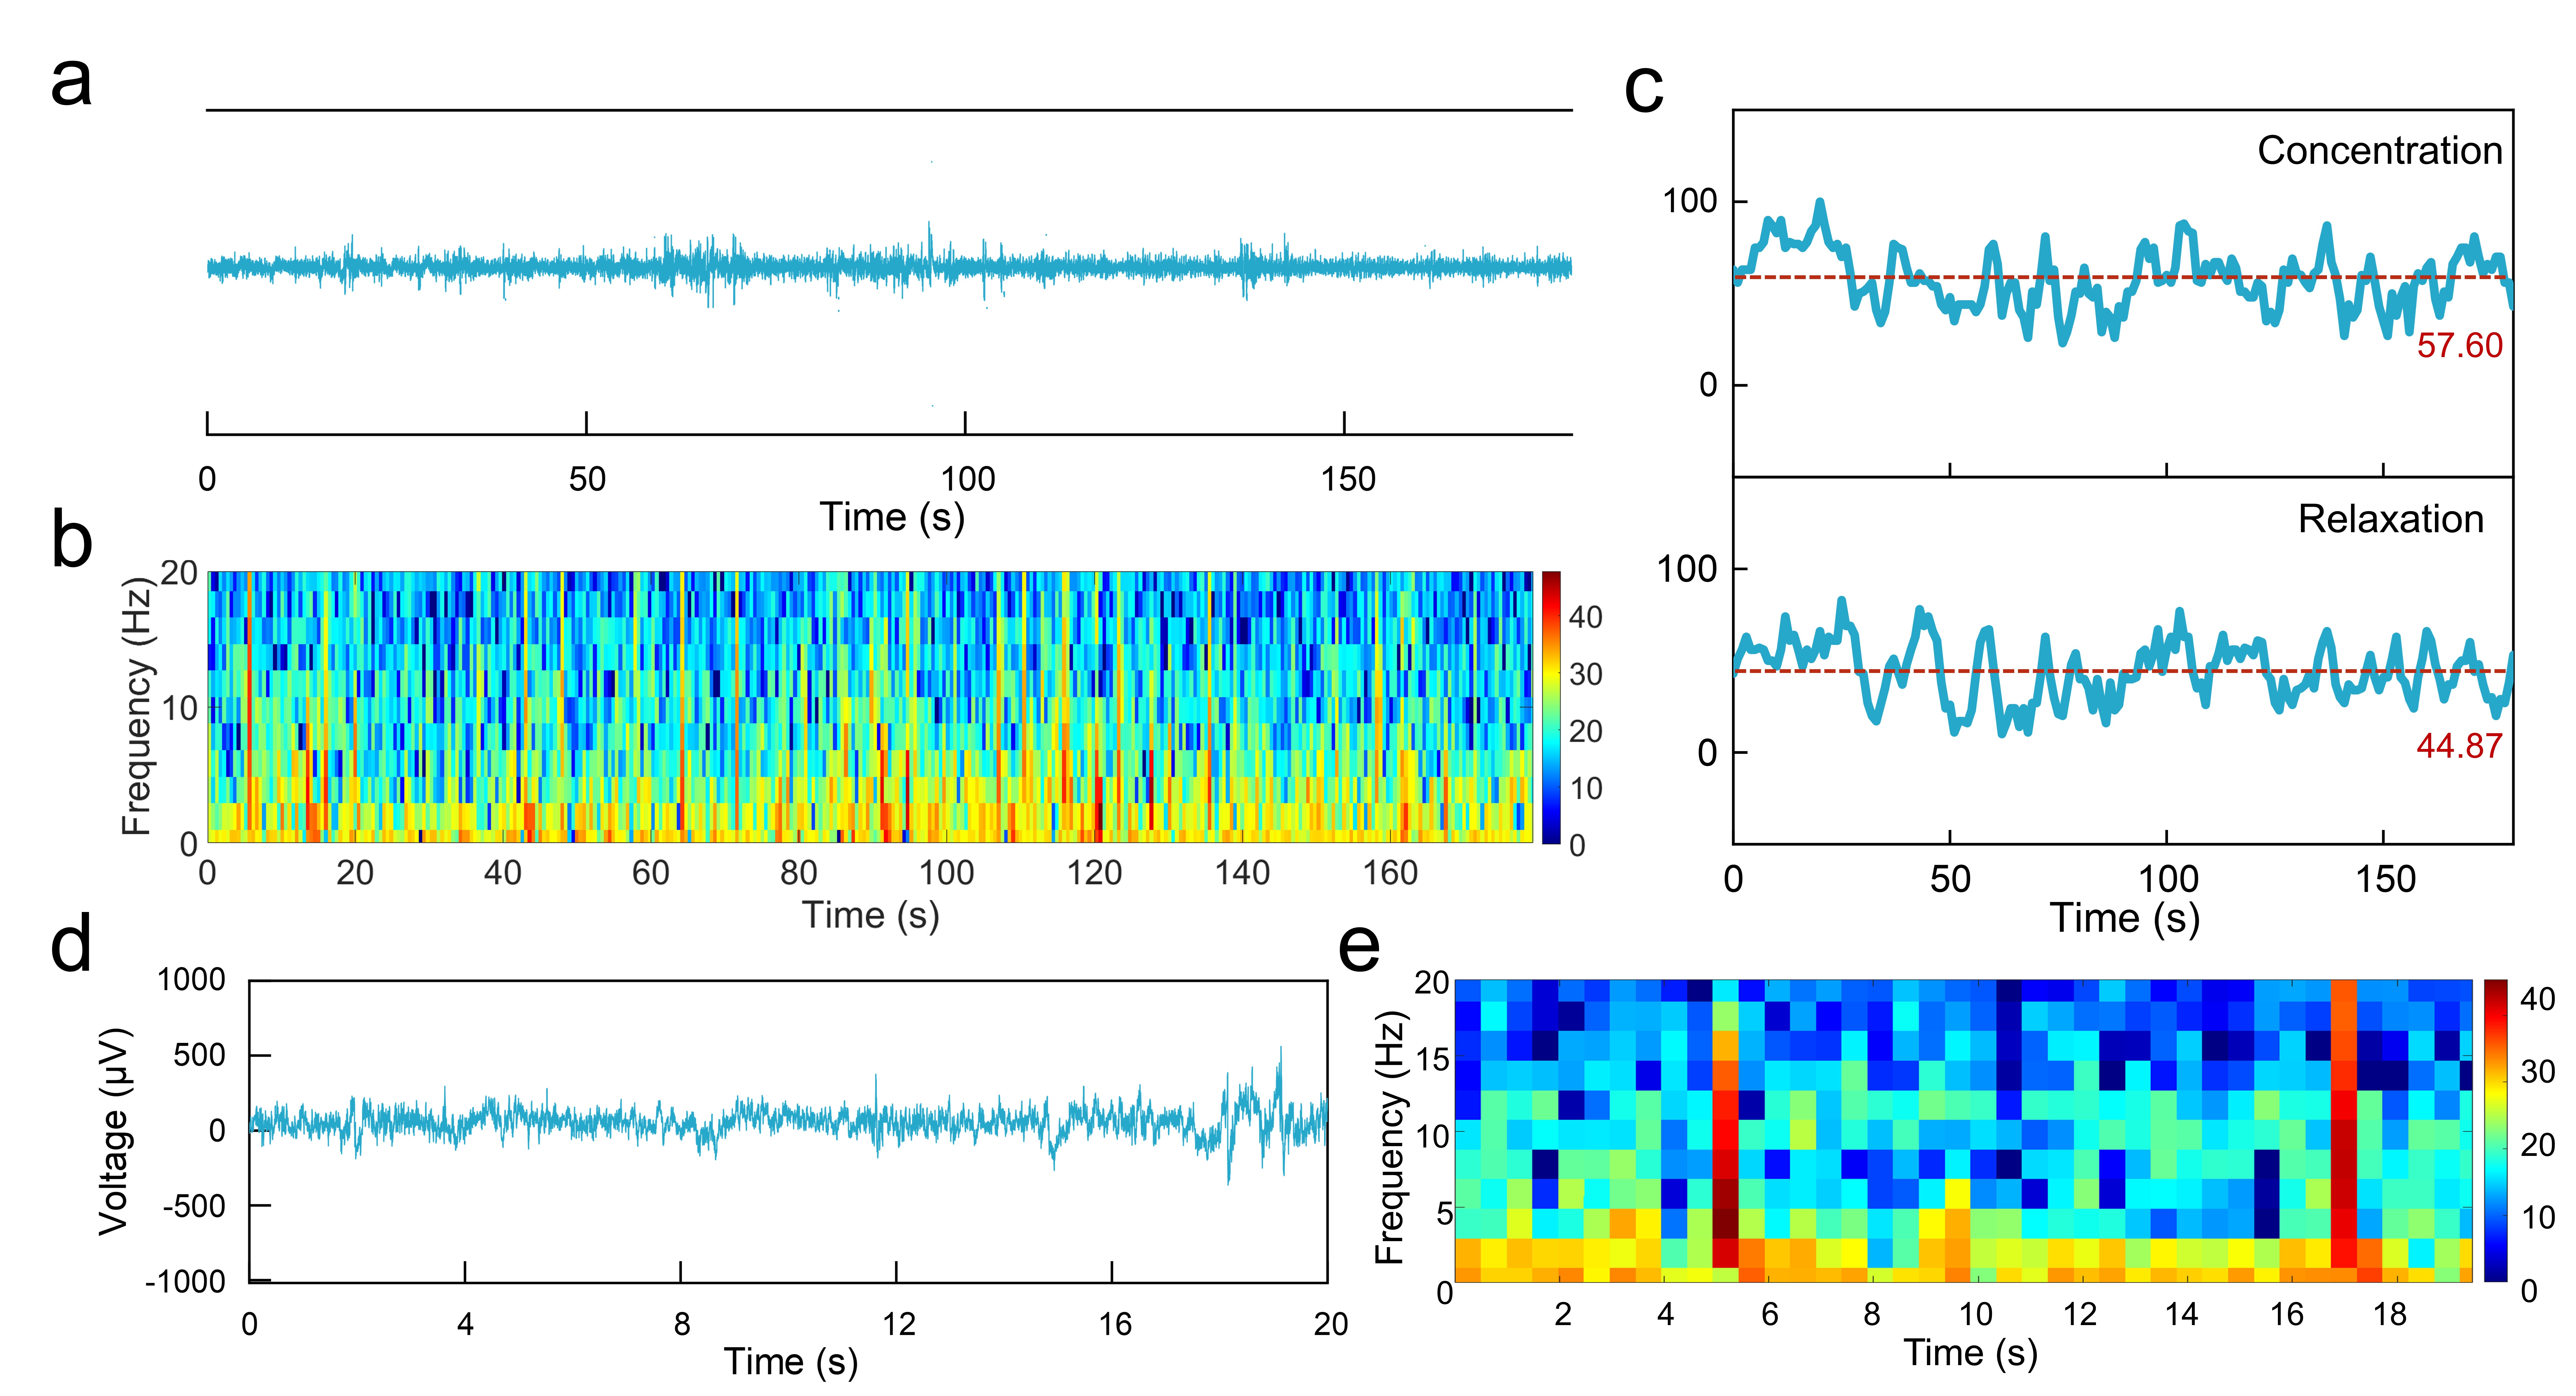
Supplementary Fig. 21. EEG monitoring during mathematical calculation by CMC-Cu(II) electrodes. a to c EEG signals (a), corresponding time-frequency spectrum (b), and coefficients of concentration and relaxation (c) during the subject's cognitive engagement in mathematical calculation. d to e Localized EEG signals over a 20-second interval (d) and the corresponding time-frequency spectrum.


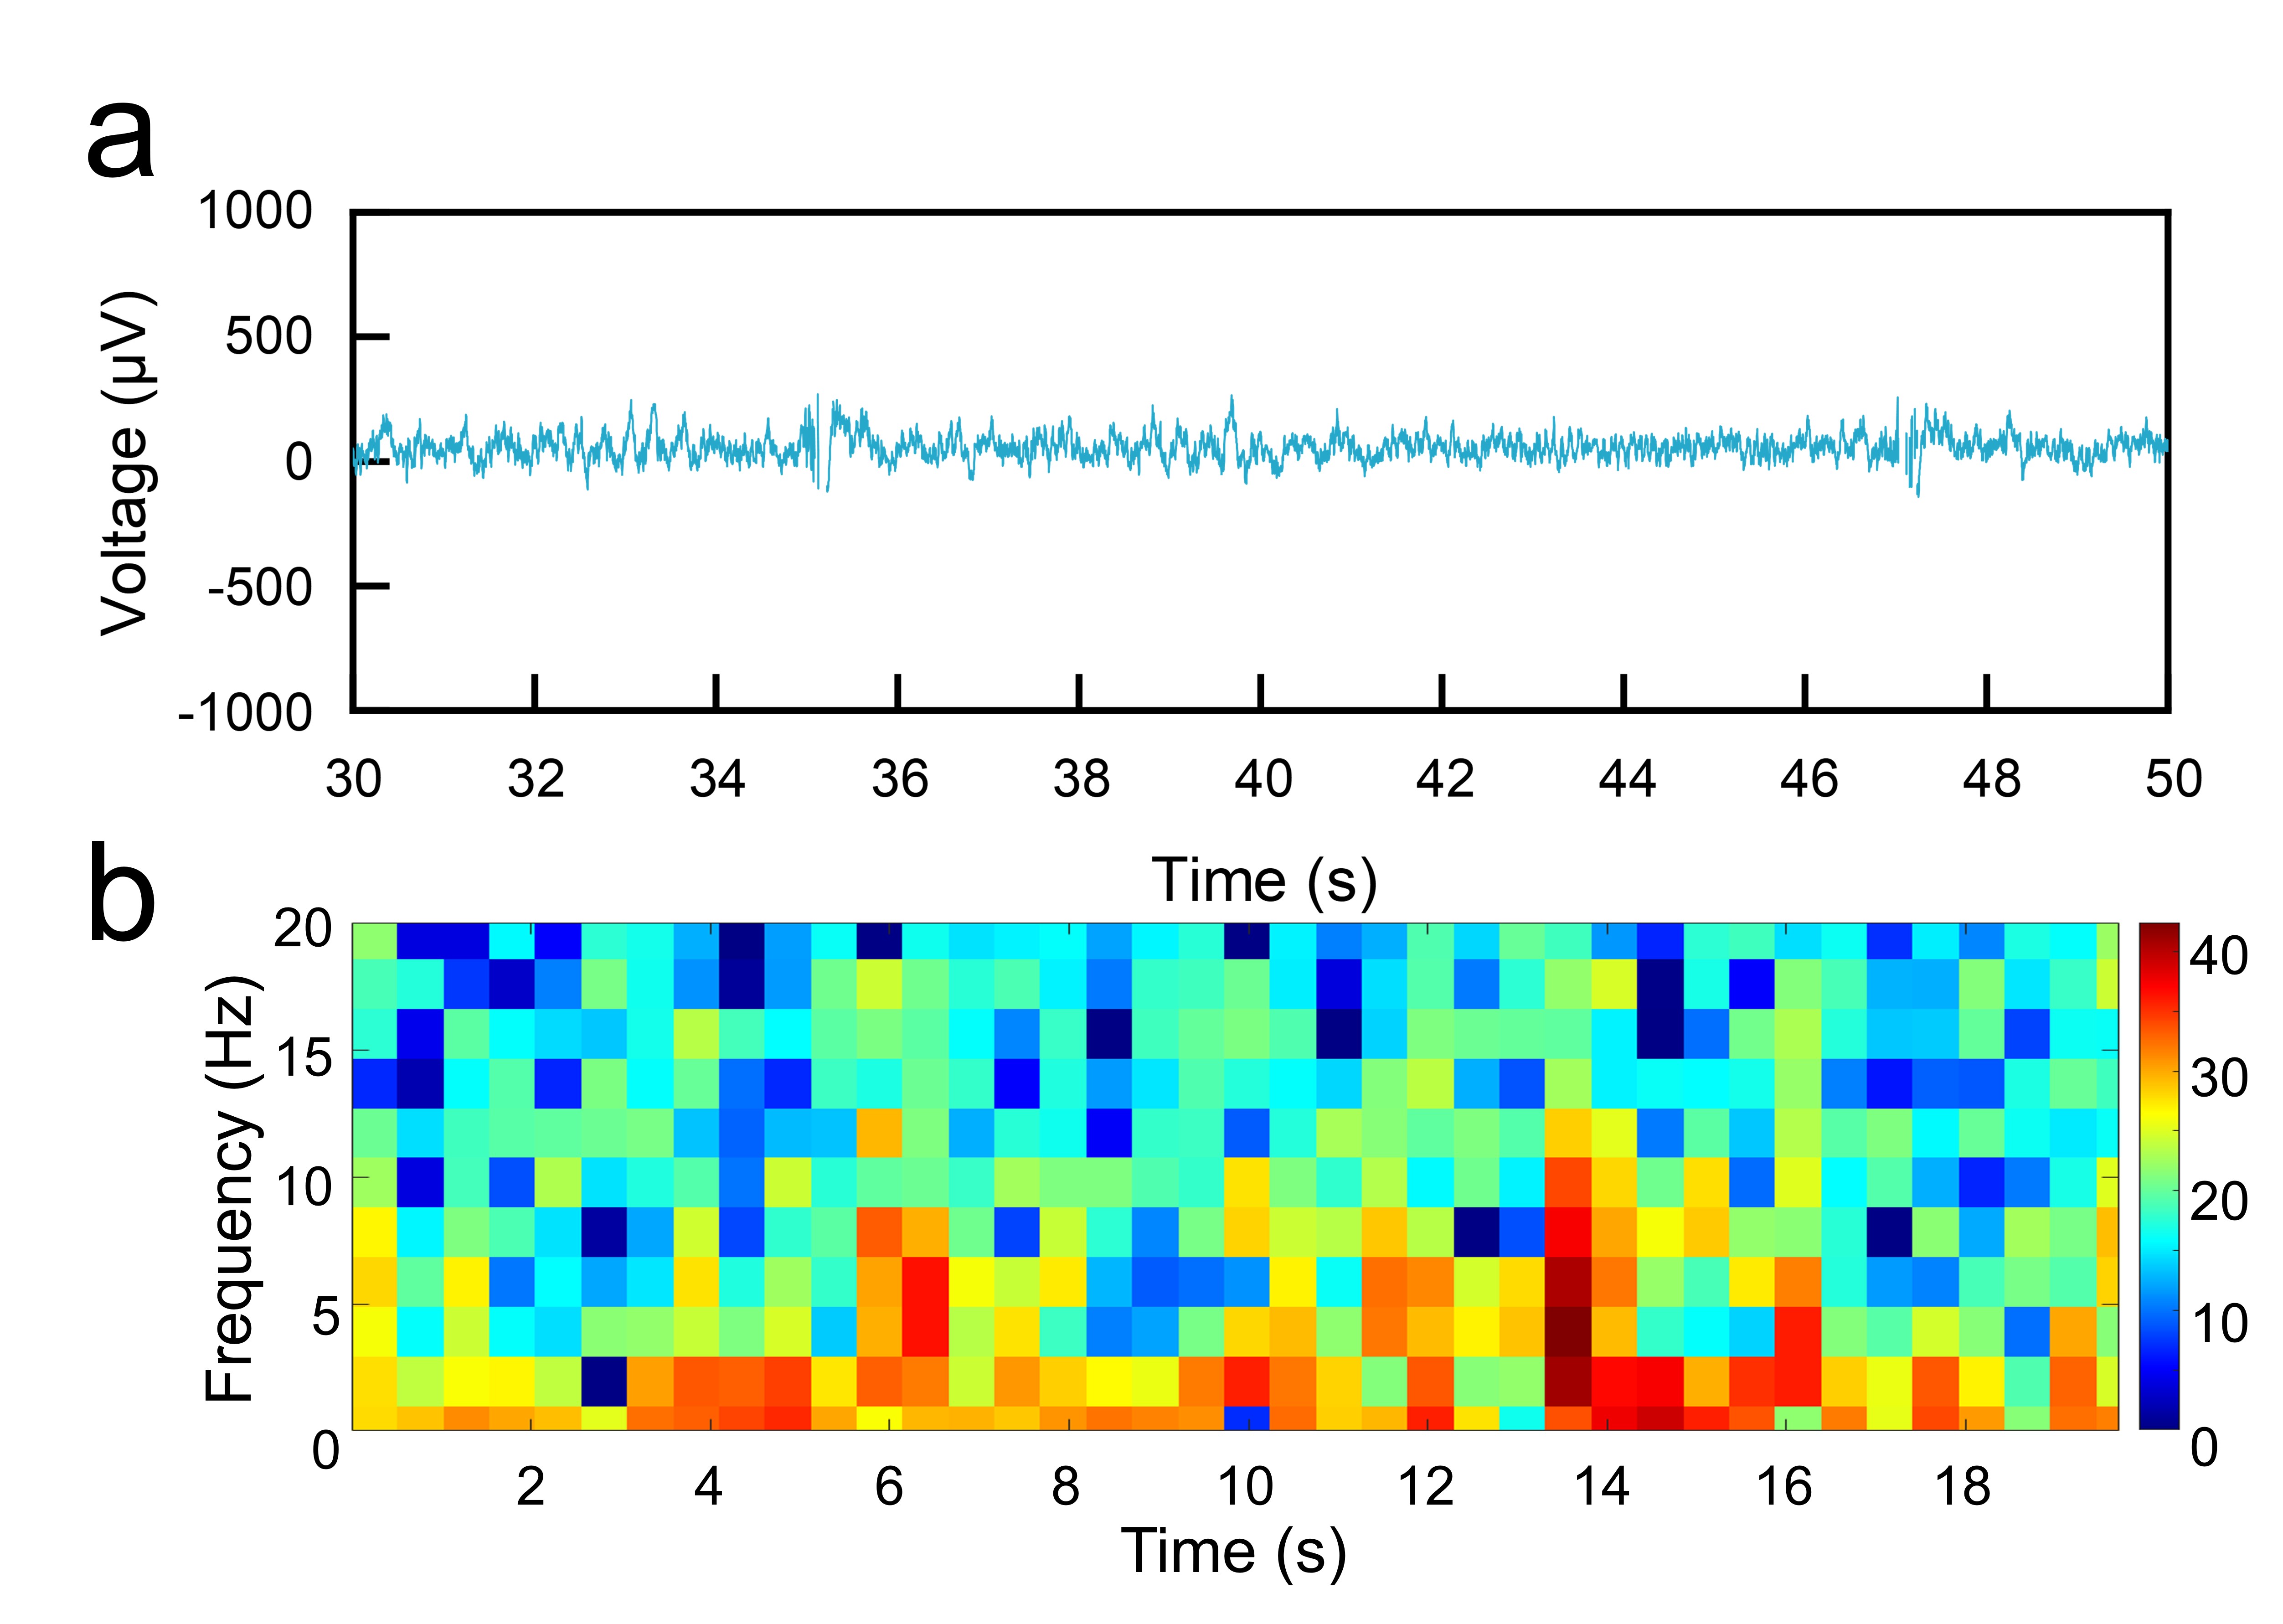


Supplementary Fig. 22. EEG monitoring during music listening by CMC-Cu(II) electrodes. a to b Localized EEG signals over a 20-second interval (a) and the corresponding time-frequency spectrum during the subject's cognitive engagement in music listening.


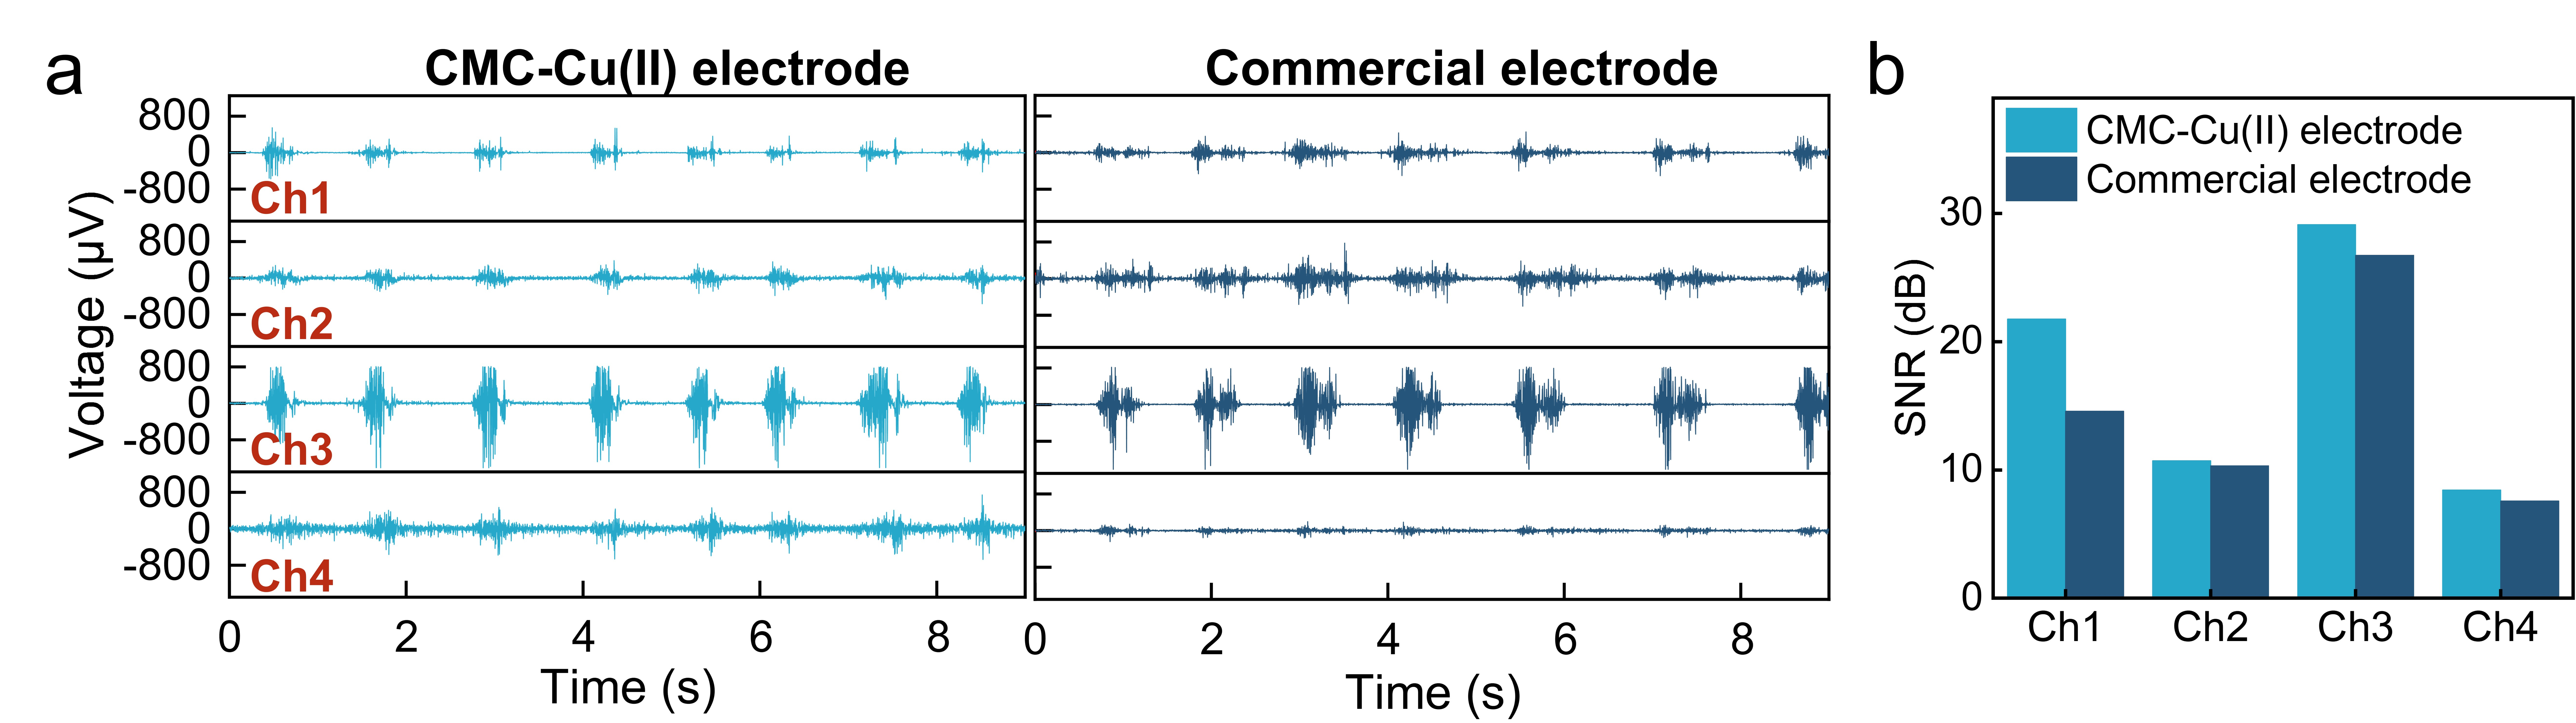


Supplementary Fig. 23. Electrophysiological monitoring of arm muscles with CMC-Cu(II) electrodes. a The periodic EMG signals in four-channel of CMC-Cu(II) and commercial electrodes when the subject makes a fist. b SNR comparisons of EMG signals collected by CMC-Cu(II) and commercial electrodes in each channel.

Supplementary Table 1 | EXAFS coordination environment analysis of CMC-Cu(II).

| Sample | Scattering Pair | CN | R (Å) | σ2 | ΔE0 (eV) |
| --- | --- | --- | --- | --- | --- |
| CMC-Cu(II) | Cu-O | 2.2±0.6 | 2.14±0.01 | 2.4±0.3 | 9.0±0.1 |
| Cu-O | 1.8±0.7 | 2.00±0.01 |

CN: coordination number, R: bond distance, σ2: Debye-Waller factors, and ΔE0: energy shift.

Supplementary Table 2 | The simulation and calculation for binding energies for the CMC-Cu(II), CMC-Ag(I), MC- Cu(II), and MC-Ag(I) model systems.

| Molds | System | Energy (eV) | Binding energy (eV) |
| --- | --- | --- | --- |
| CMC-Cu(II) | Two carboxymethyl substituted glucose units (2glucose) | -1830.068415 | 1.40 |
| Cu(II) | -195.721136 |
| 2glucose-Cu(II) | -2024.392057 |
| CMC-Ag(I) | 2glucose | -1830.068415 | 1.44 |
| Ag(I) | -145.535849 |
| 2glucose- Ag(I) | -1974.168157 |
| MC-Cu(II) | Two methyl substituted glucose units (2glucose) | -1452.953908 | 2.28 |
| Cu(II) | -195.721136 |
| 2glucose-Cu(II) | -1646.394555 |
| MC-Ag(I) | 2glucose | -1452.953908 | 2.40 |
| Ag(I) | -145.535849 |
| 2glucose- Ag(I) | -1596.090209 |

**Supplementary Videos**

**Supplementary Video 1**: CMC-Cu(II) membrane fabrication by “dipping-dipping” method.

**Supplementary Video 2**: CMC-Fe(II) membrane fabrication by “dipping-dipping” method.

**Supplementary Video 3**: CMC-Ca(II) membrane fabrication by “dipping-dipping” method.

Supplementary References

1. Wu, M.*, et al.* A high-performance hydroxide exchange membrane enabled by Cu2+-crosslinked chitosan. *Nat. Nanotechnol.* 17, 629-636 (2022).
